# Supplementary material
Source: ML conference proceedings conference paper supplement (https://openreview.net/forum?id=vFK6PhTxKHR7)

The figure is a line plot with 'Global Rounds' on the x-axis (0 to 100) and 'local\_f1\_acc' on the y-axis (0.85 to 1.0). There are 10 data series, all labeled 'local\_f1\_acc' in the legend, represented by different colored dashed lines. All series start at approximately 0.85 accuracy at round 0. They all show a sharp increase, reaching a plateau of approximately 0.95 accuracy by round 10. After round 10, the accuracy remains relatively stable, with a slight downward trend towards the end of the training, stabilizing around 0.92 accuracy by round 100. The lines are closely clustered throughout the entire range of global rounds.

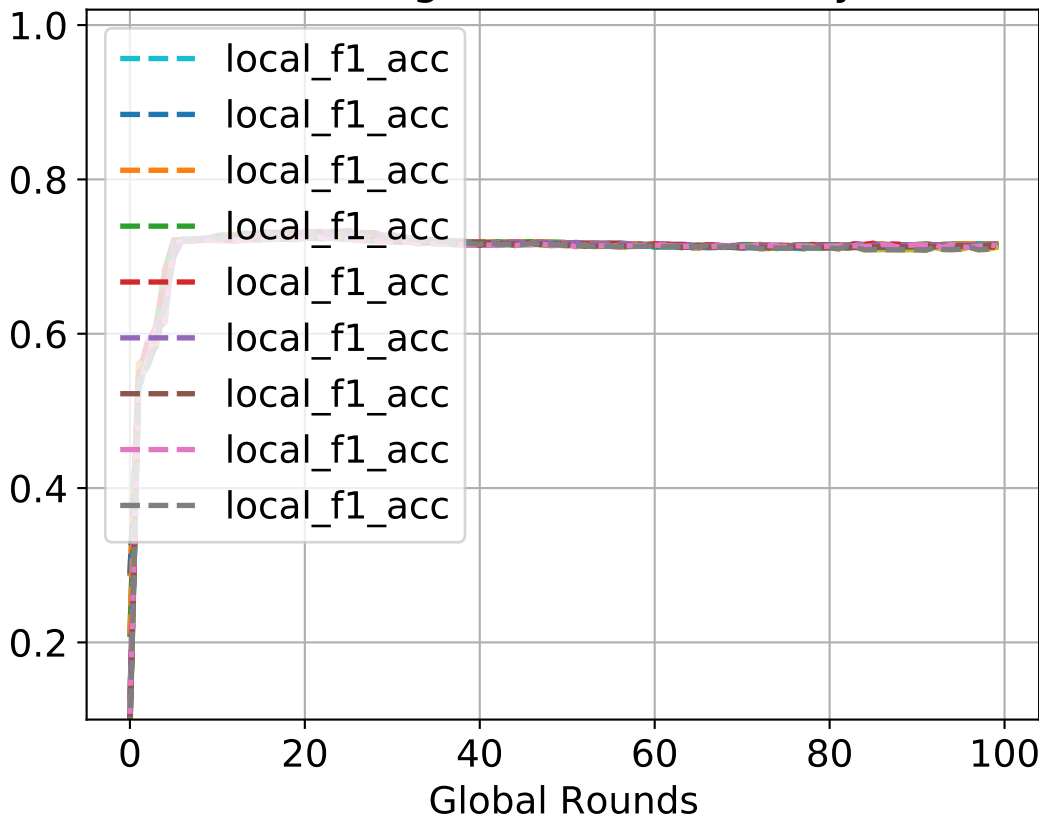

Supplement: supplementary_material [file attachment]
