# Supplementary material
Source: ML conference proceedings conference paper supplement (https://openreview.net/forum?id=vFK6PhTxKHR7)

# Training Client Reconstruction Loss

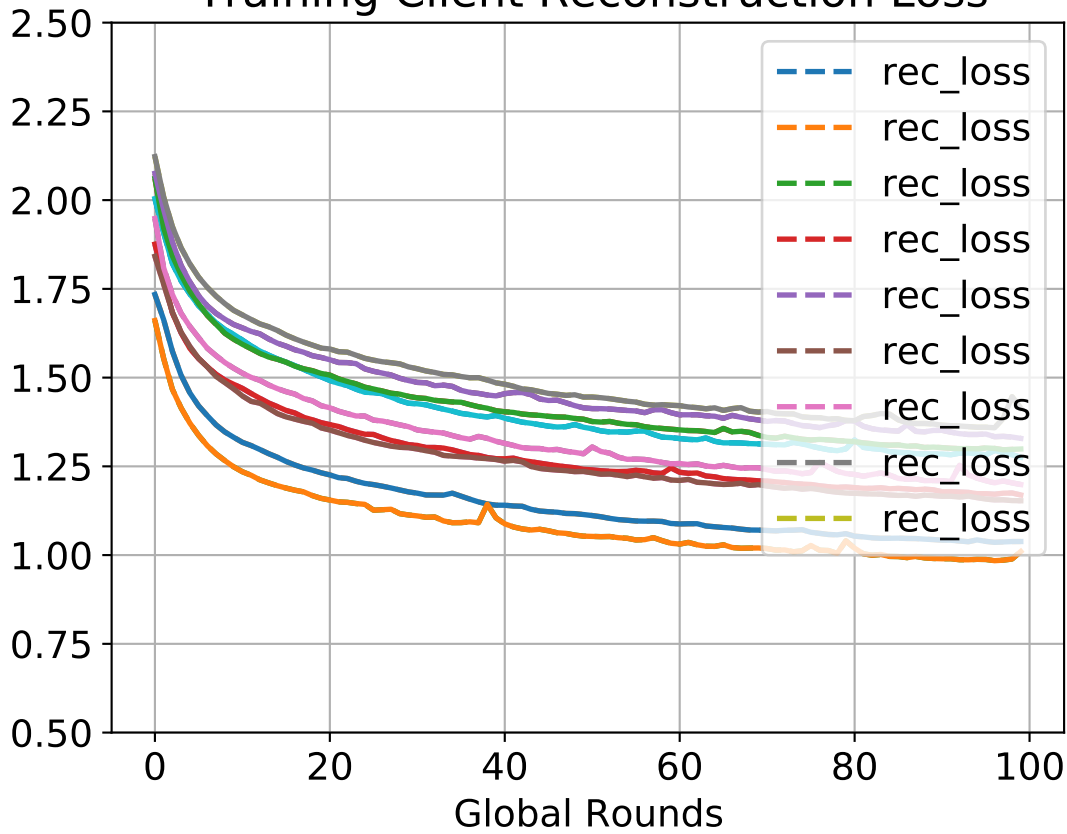

Supplement: supplementary_material [file attachment]

# Testing Loss

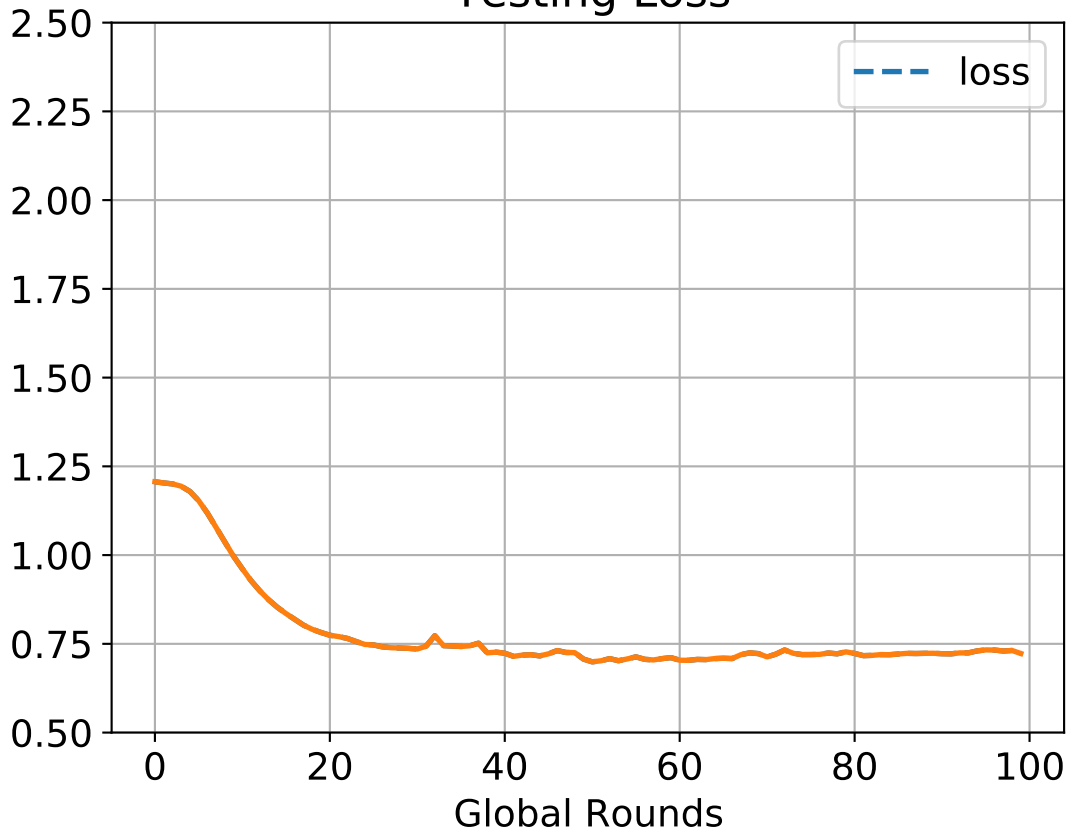

Supplement: supplementary_material [file attachment]

# Training Global Reconstruction Loss

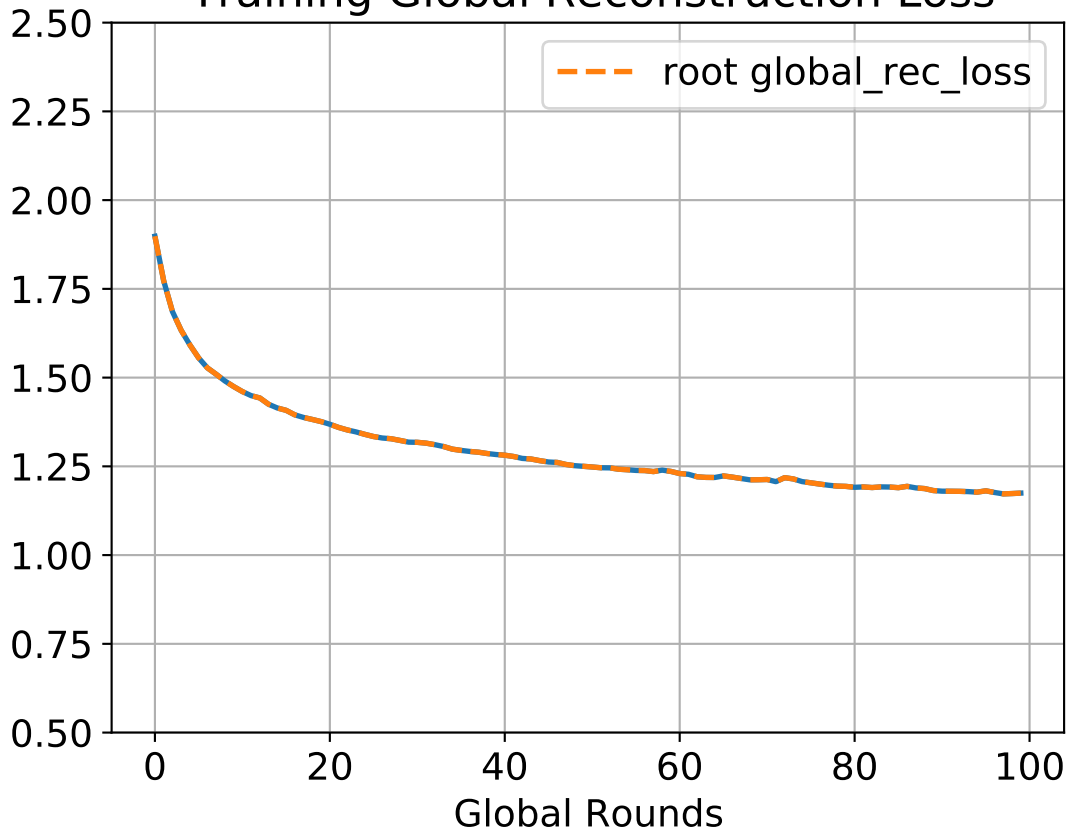

Supplement: supplementary_material [file attachment]

# Avg Testing Local F1 Accuracy

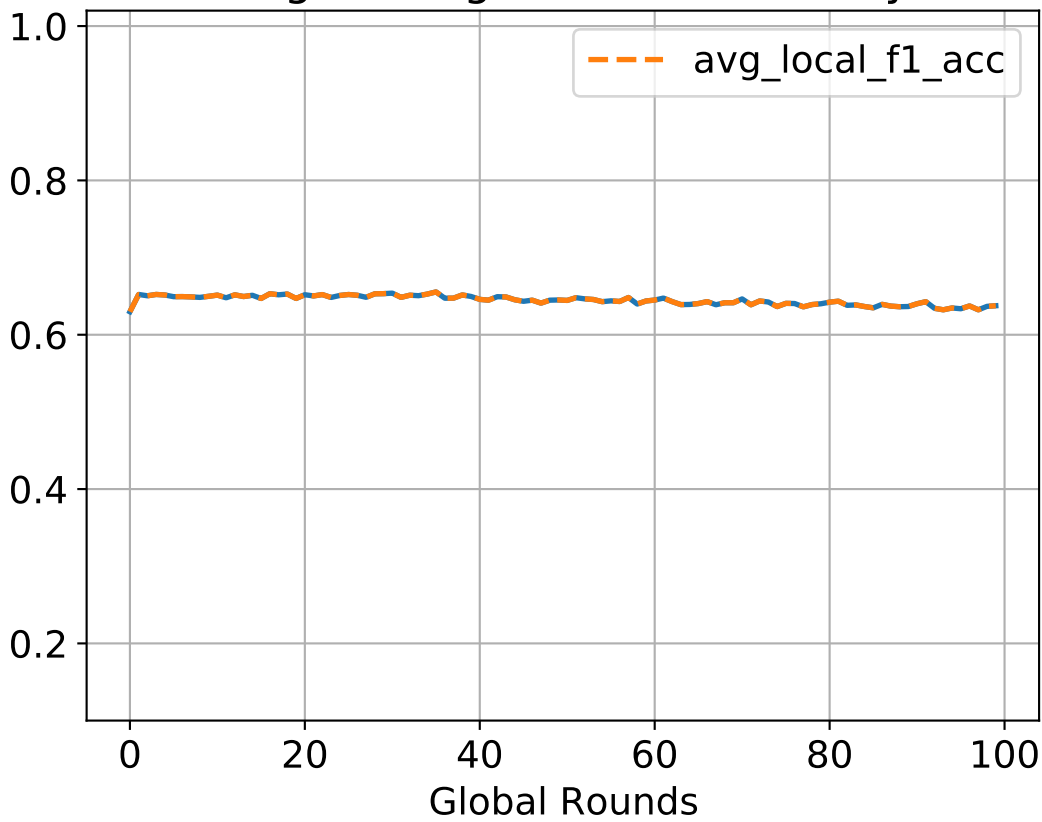

Supplement: supplementary_material [file attachment]

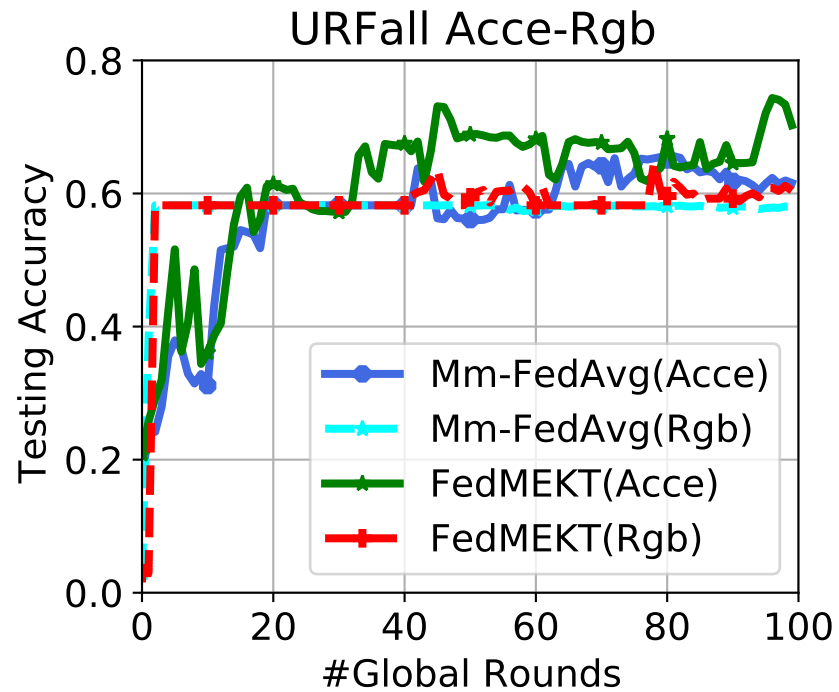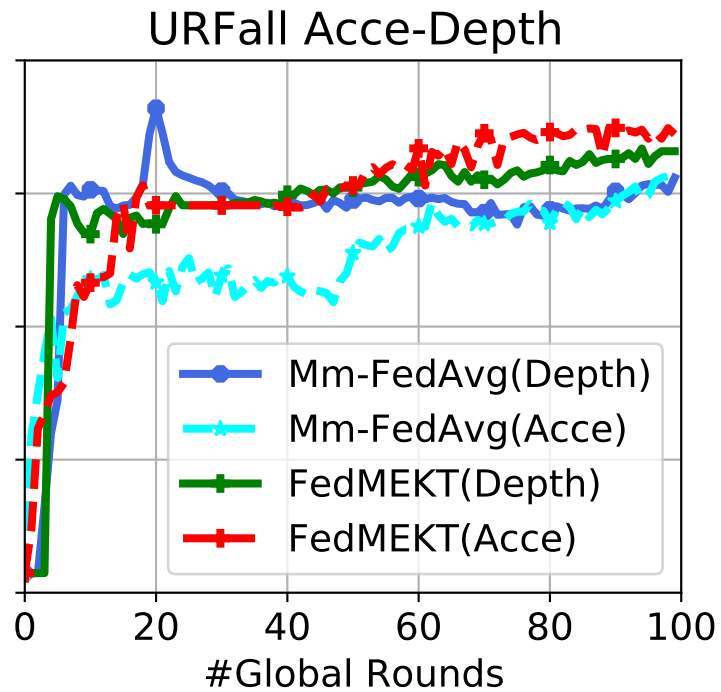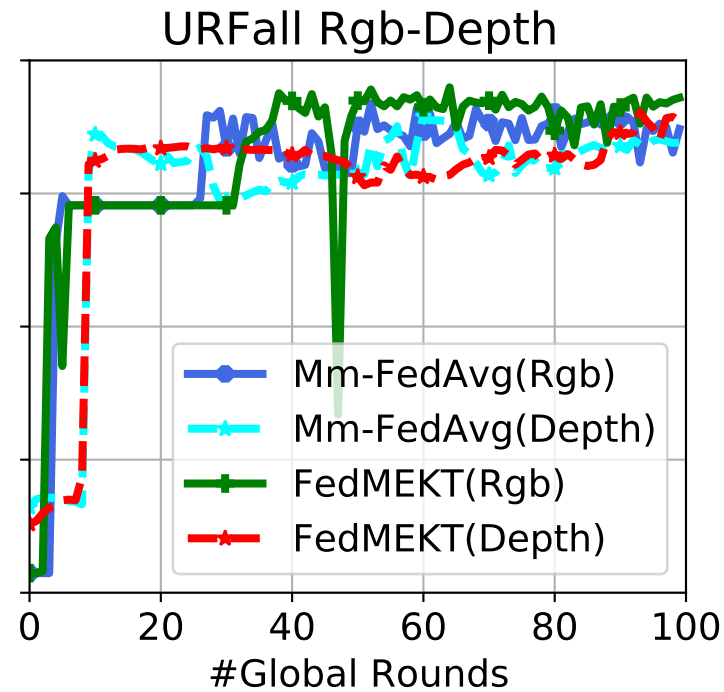

Supplement: supplementary_material [file attachment]

## Training Client Reconstruction Loss

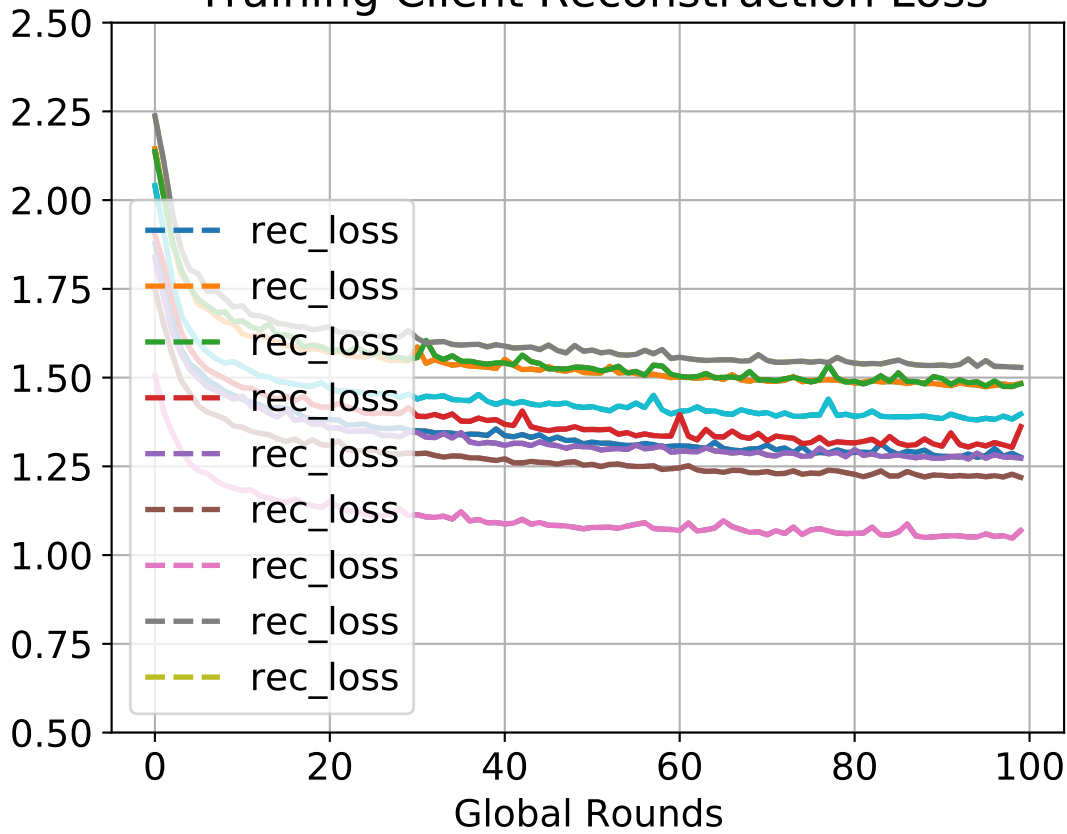

Supplement: supplementary_material [file attachment]

# AVG Clients Model (Spec-Gen) Testing Accuracy

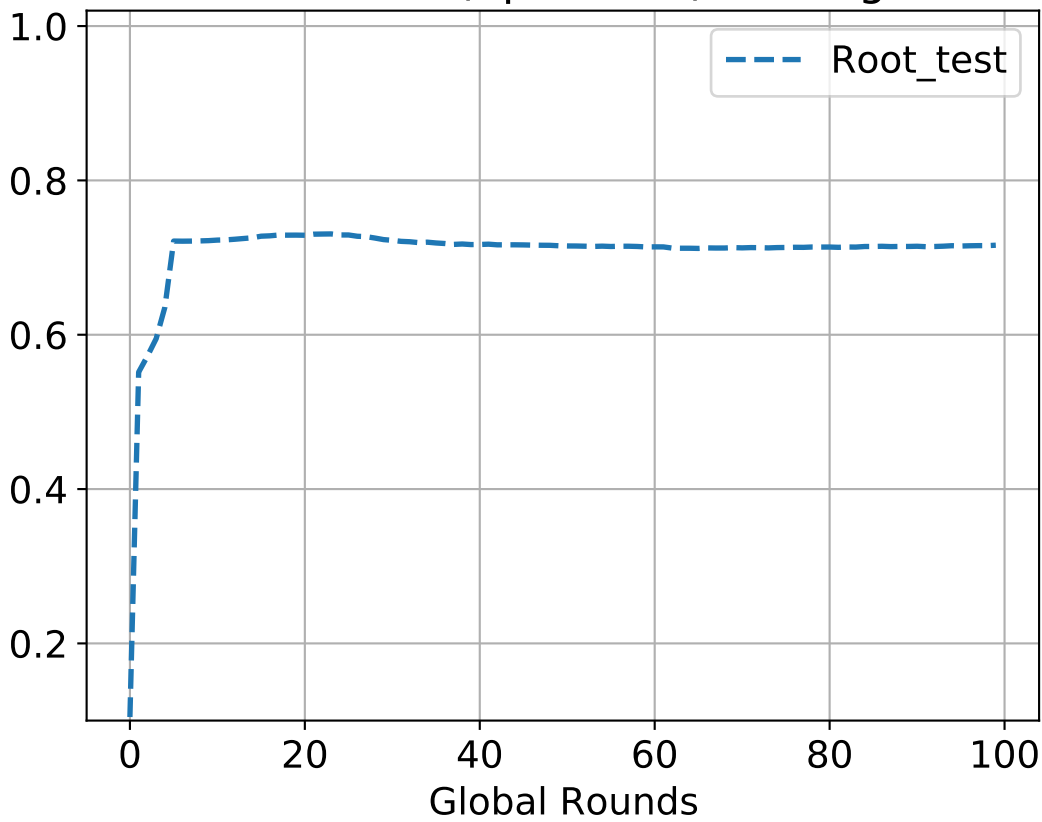

Supplement: supplementary_material [file attachment]

# Training Global Knowledge Transfer Loss

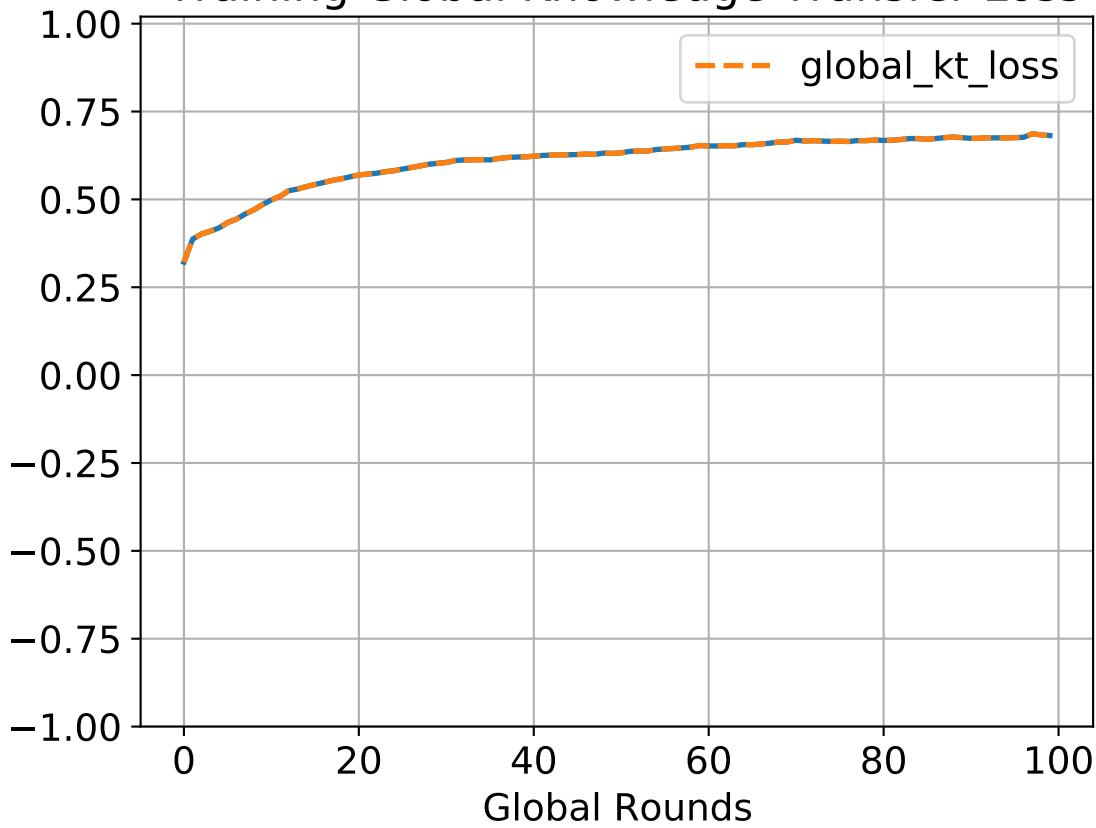

Supplement: supplementary_material [file attachment]

opp Acce-Gyro

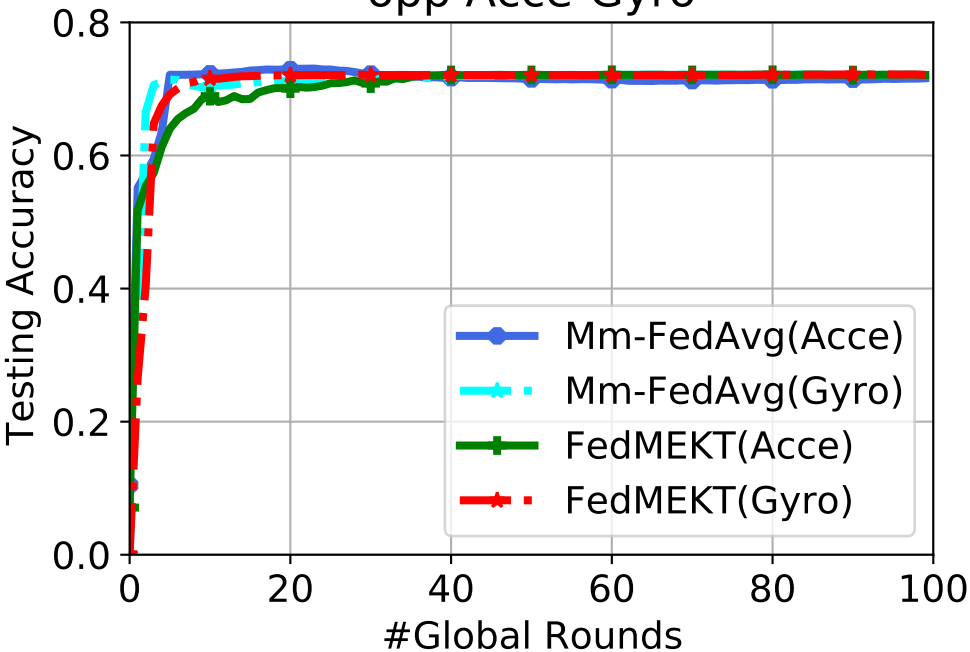

Supplement: supplementary_material [file attachment]

# AVG Clients Model (Spec-Gen) Testing Accuracy

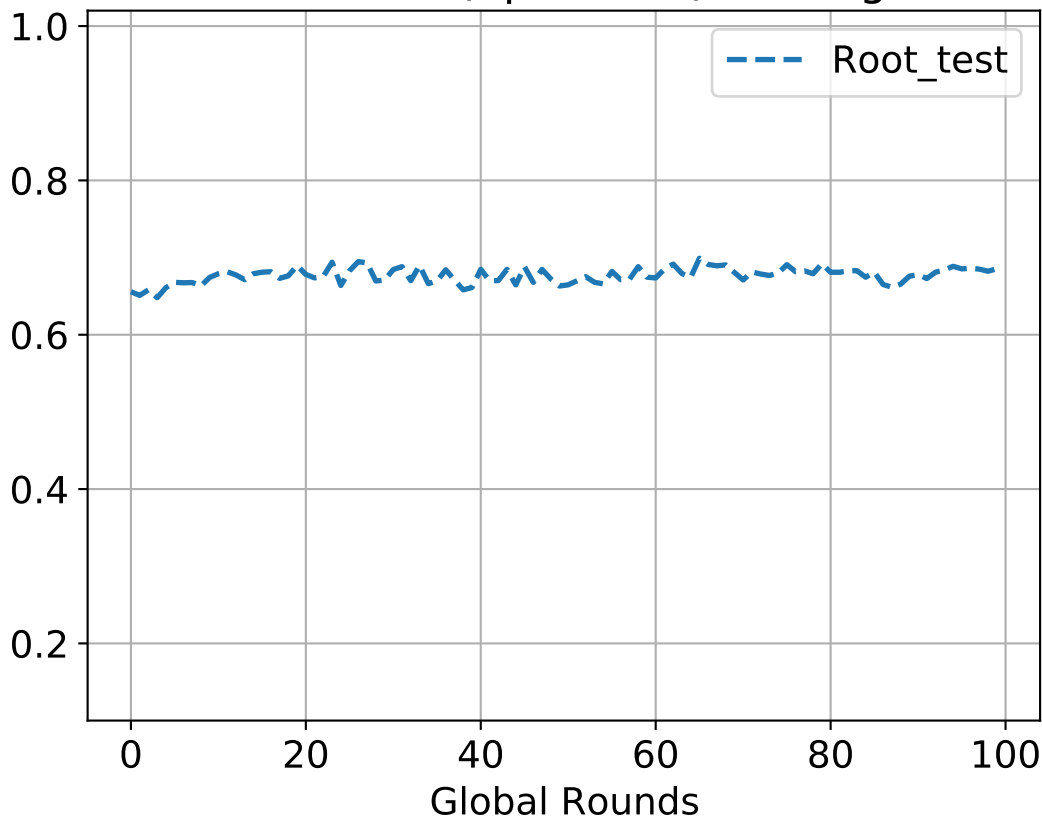

Supplement: supplementary_material [file attachment]

# Testing Local F1 Accuracy

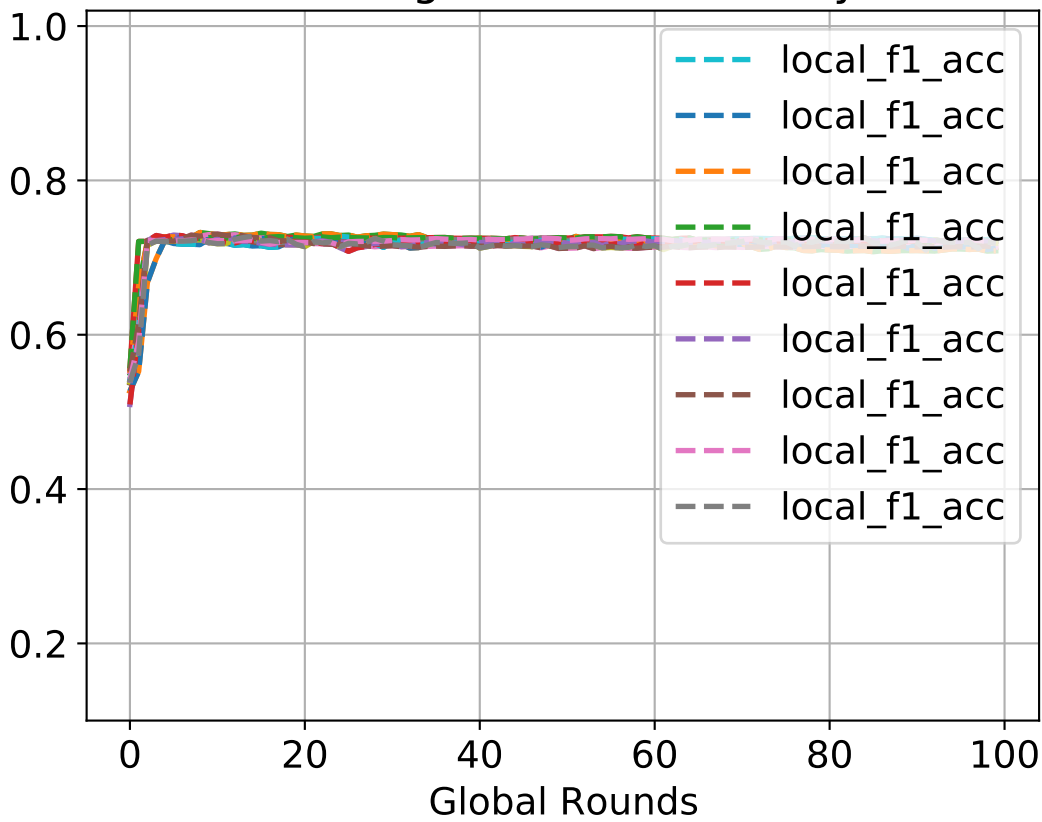

Supplement: supplementary_material [file attachment]

# Training Global Reconstruction Loss

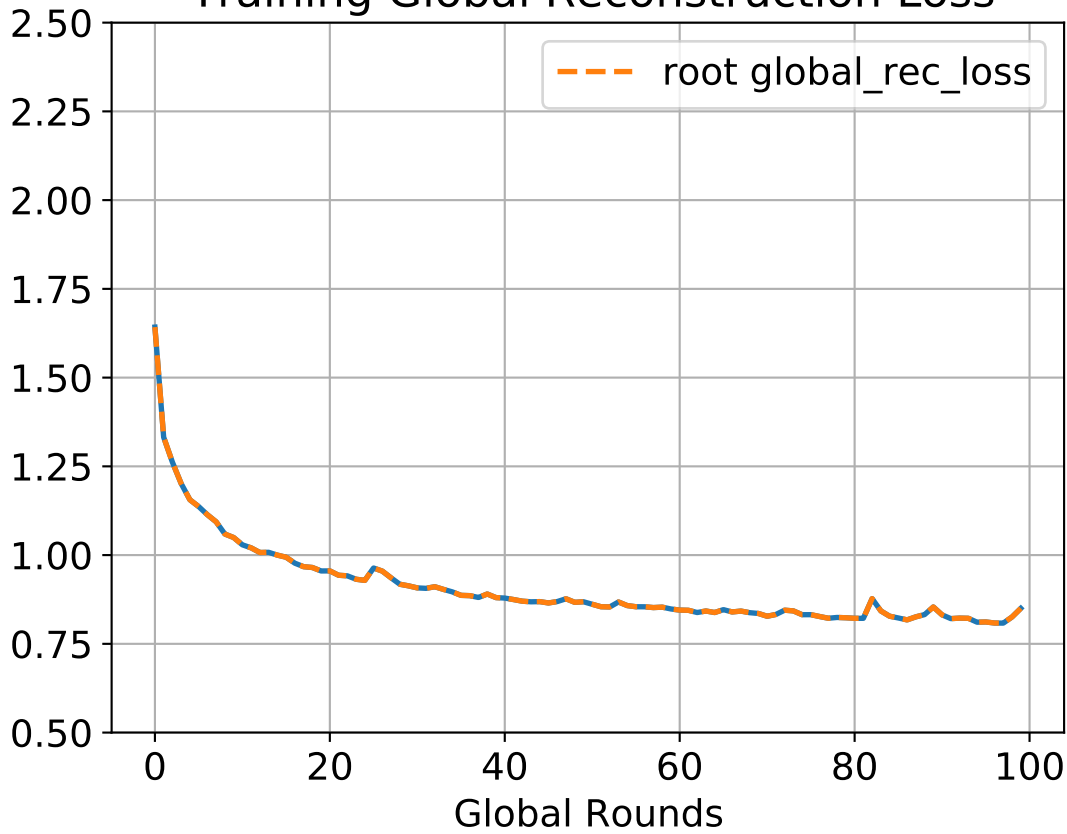

Supplement: supplementary_material [file attachment]

# Training Client Reconstruction Loss

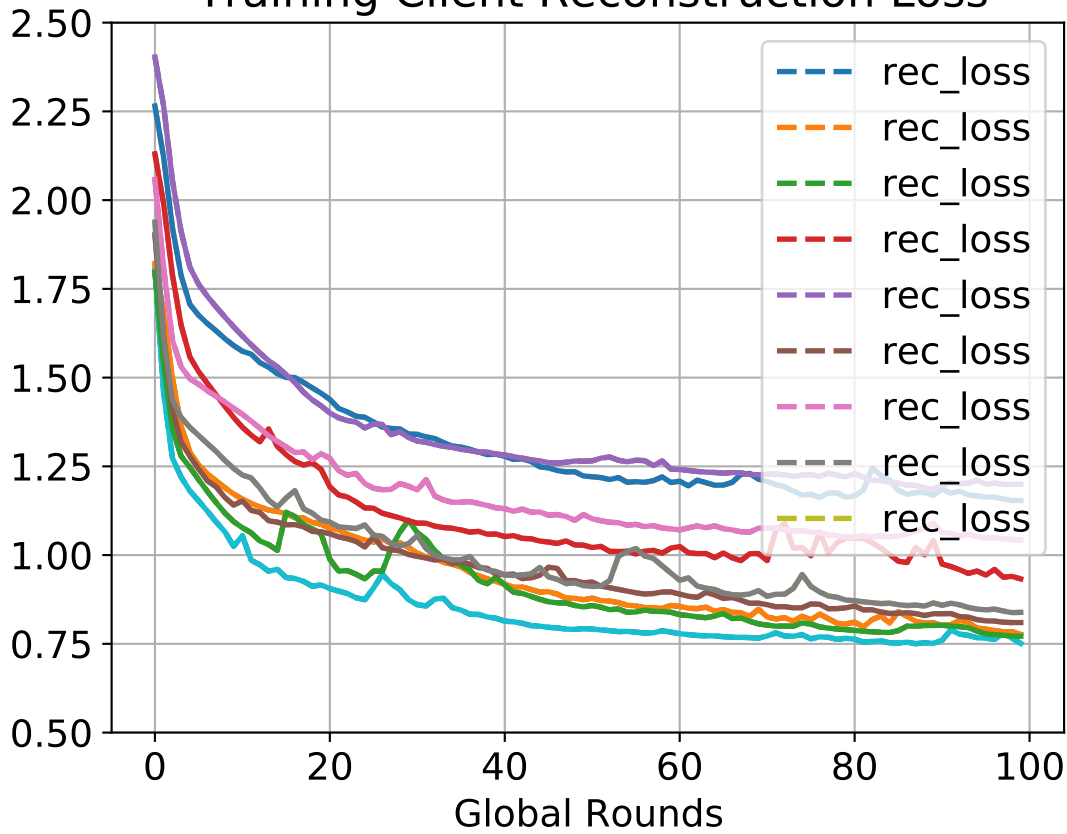

Supplement: supplementary_material [file attachment]

# Training Client Reconstruction Loss

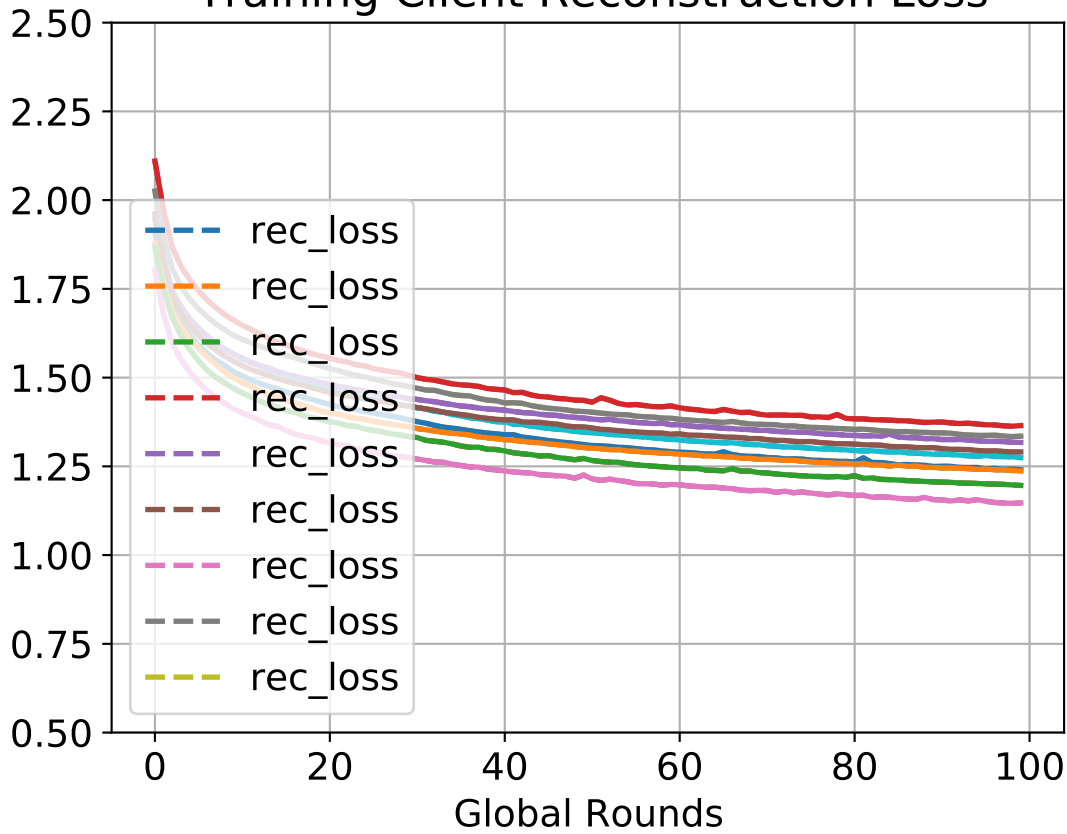

Supplement: supplementary_material [file attachment]

# Avg Testing Local F1 Accuracy

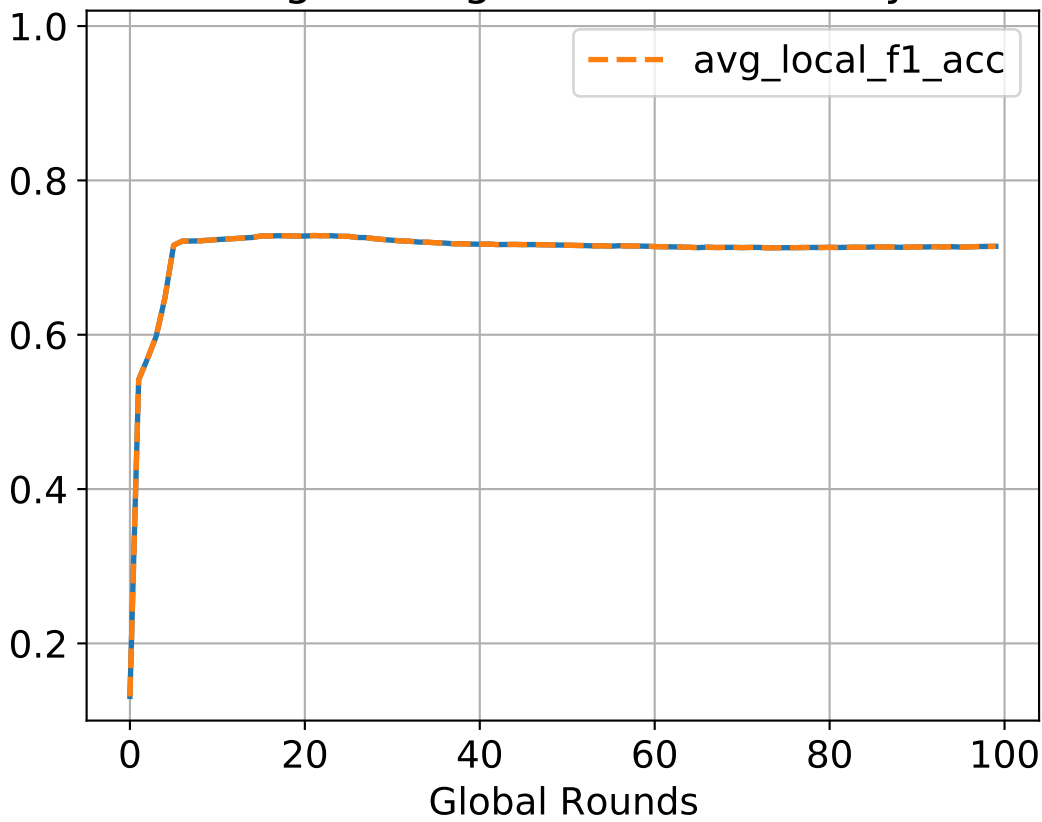

Supplement: supplementary_material [file attachment]

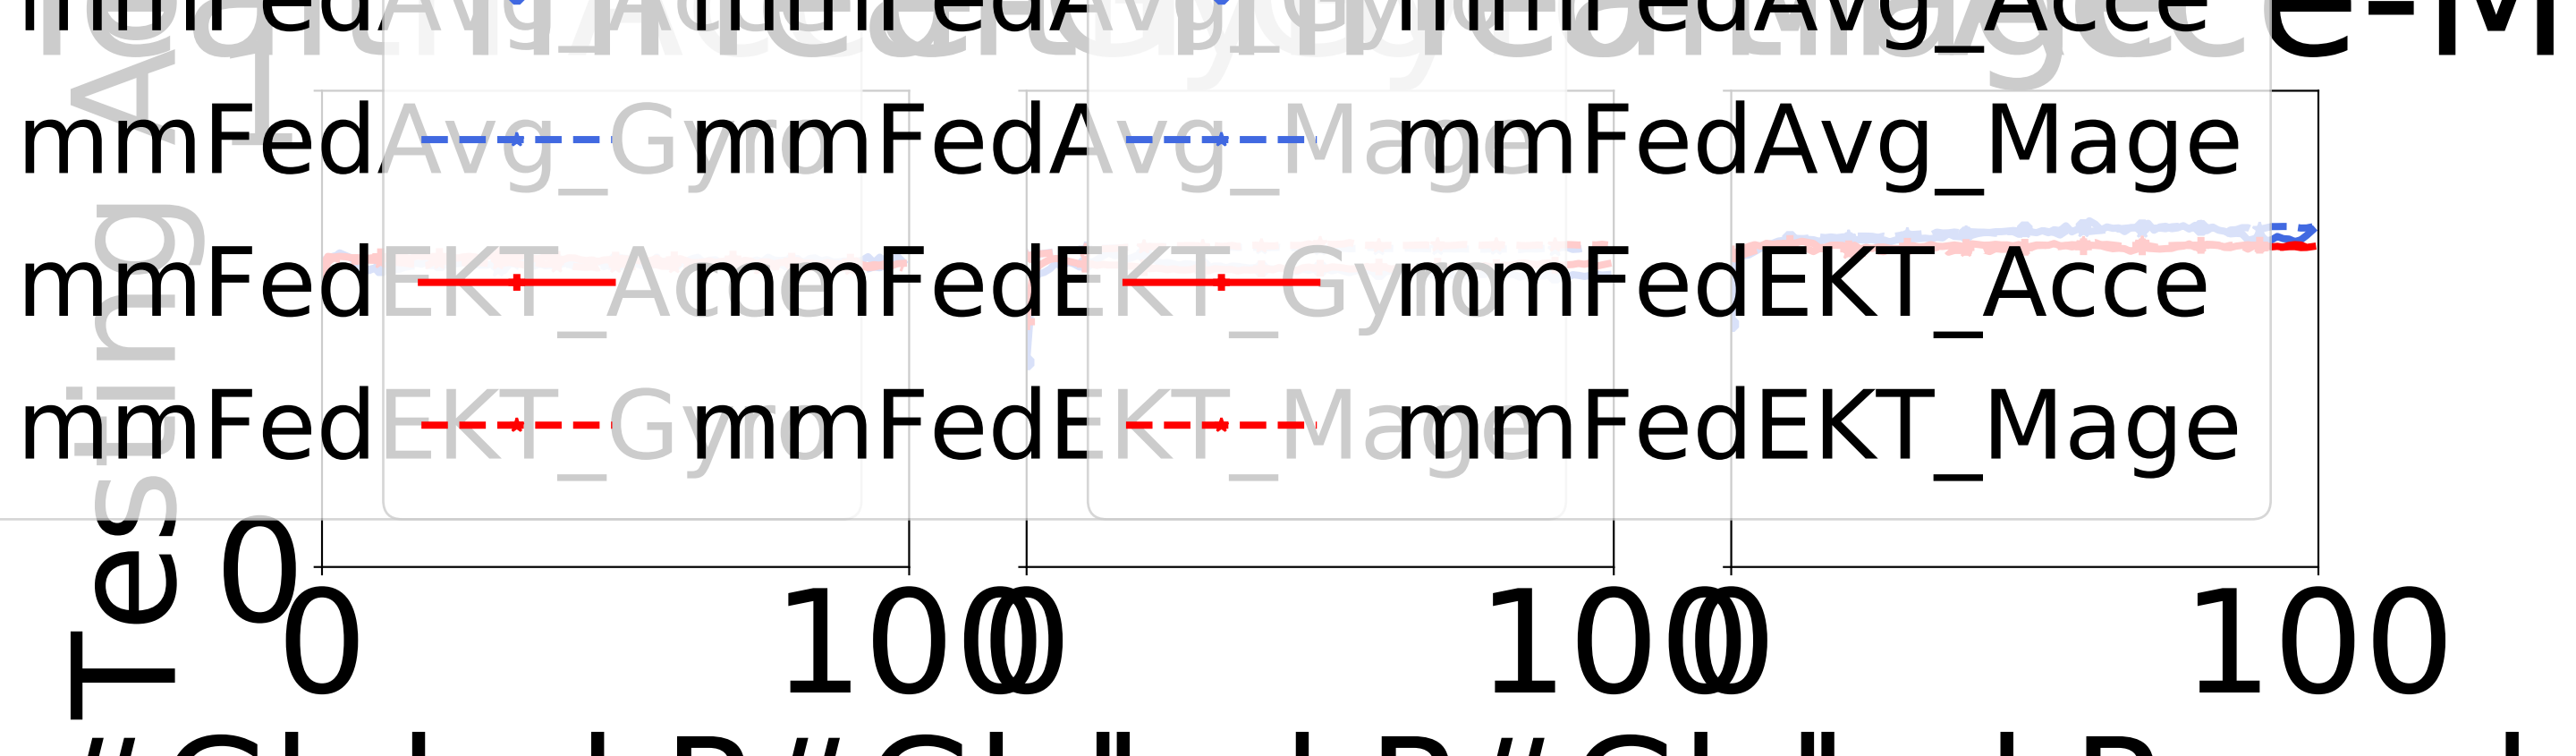

Supplement: supplementary_material [file attachment]

# Testing Loss

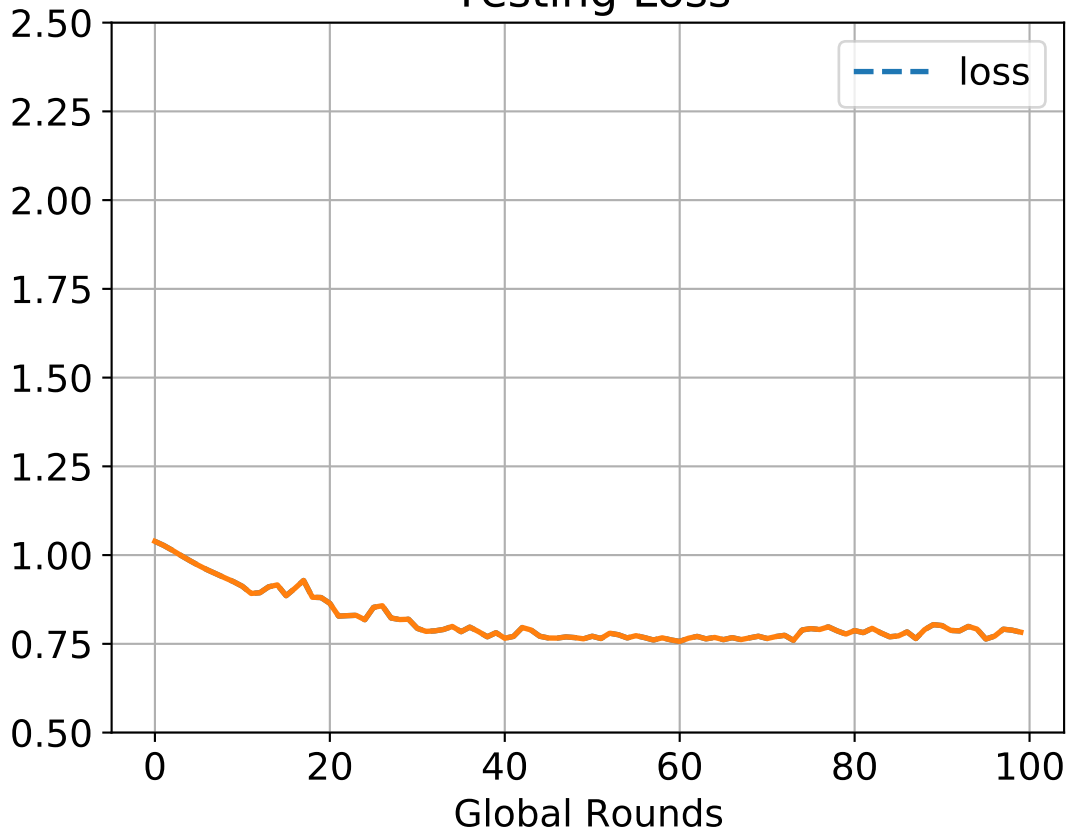

Supplement: supplementary_material [file attachment]

# Testing Local F1 Accuracy

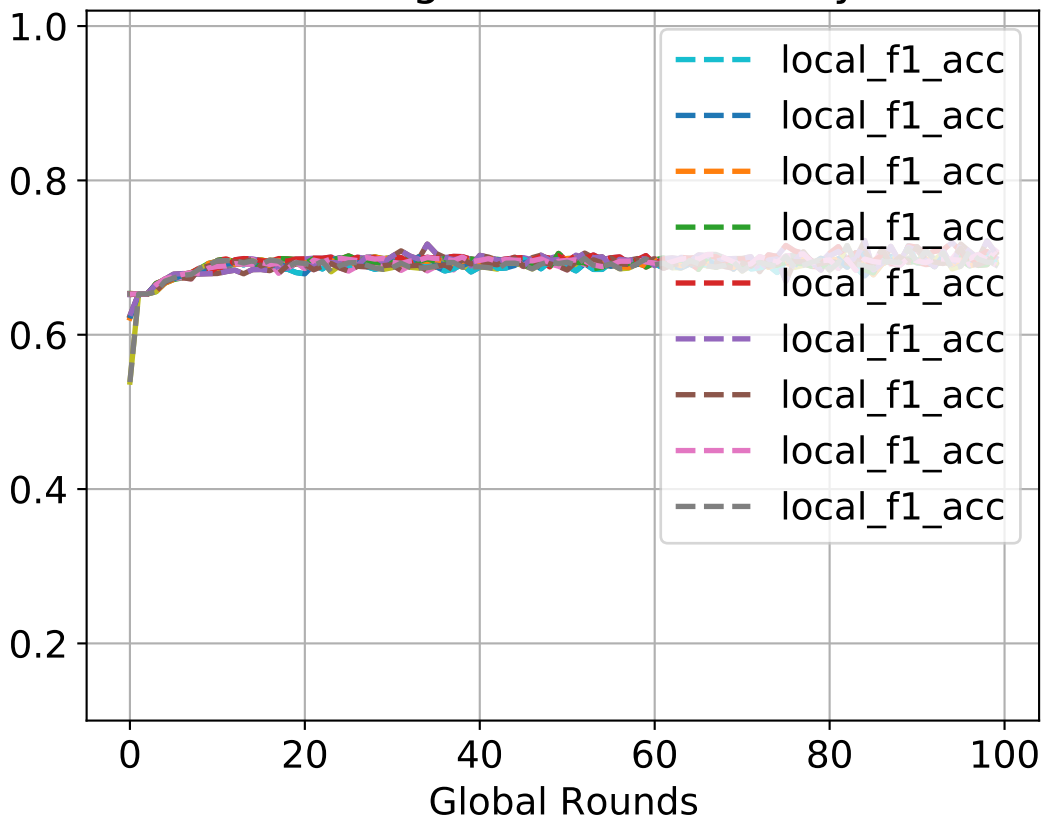

Supplement: supplementary_material [file attachment]

# Testing Loss

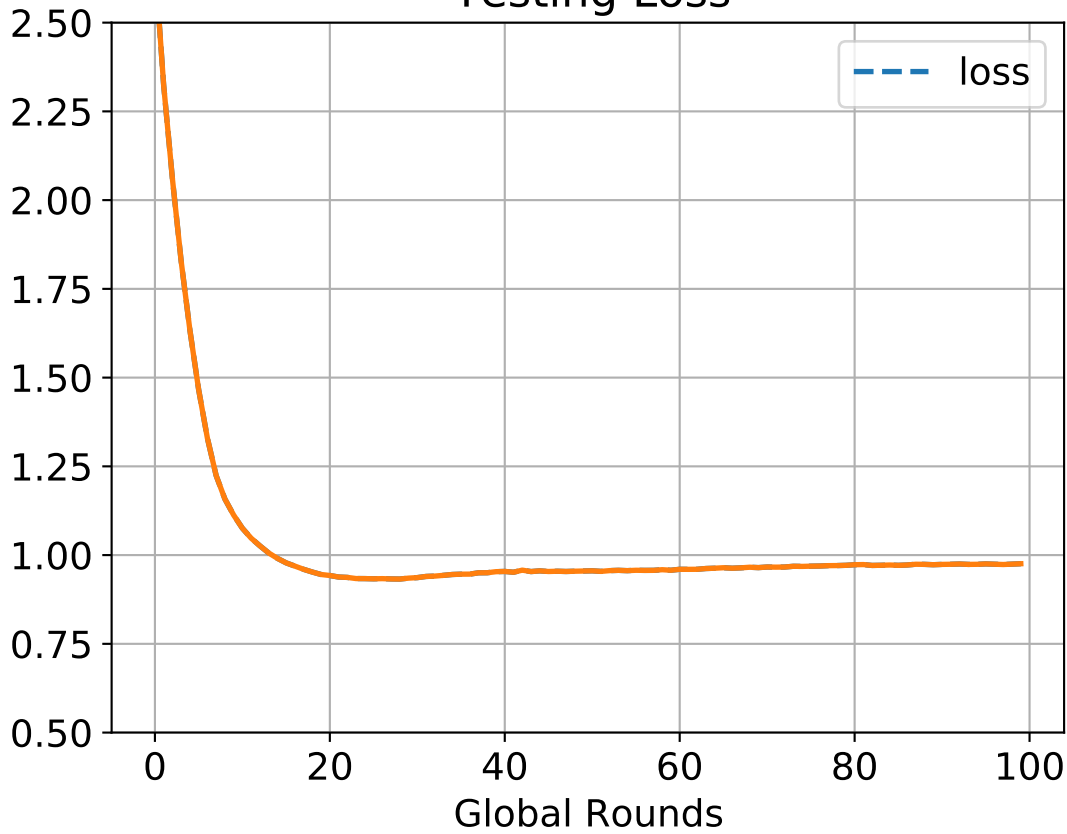

Supplement: supplementary_material [file attachment]

# Training Global Reconstruction Loss

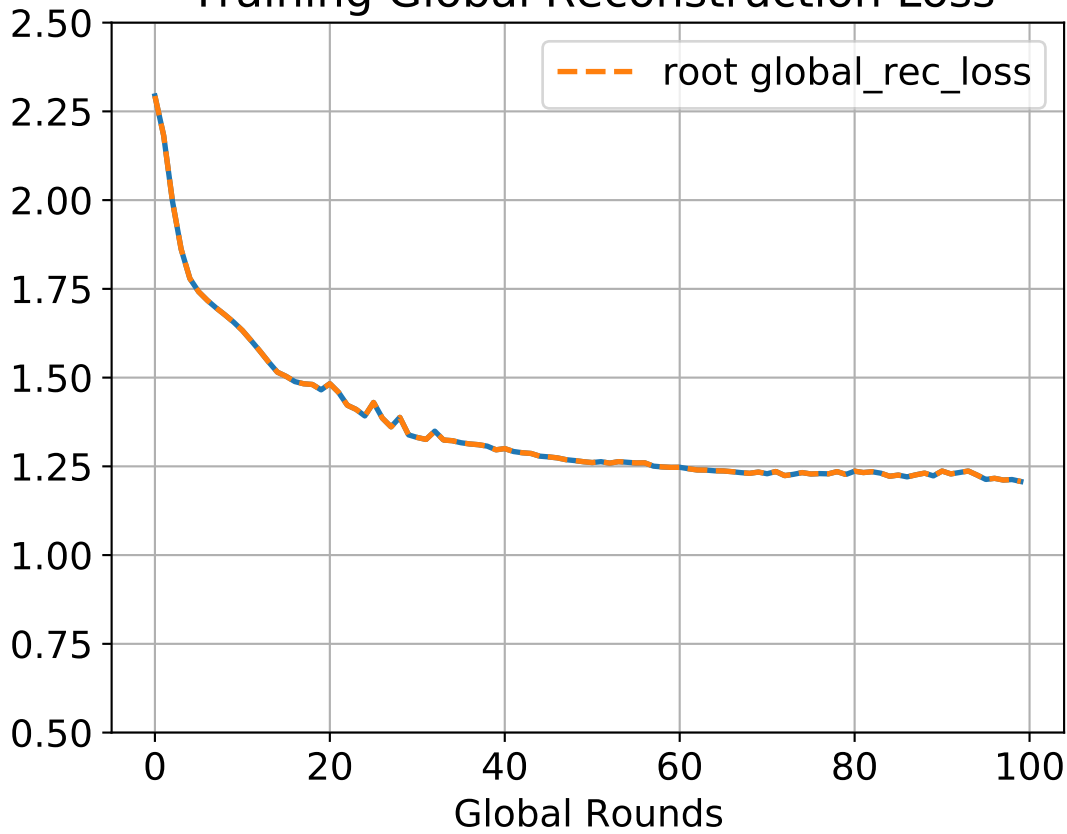

Supplement: supplementary_material [file attachment]

## Testing Local F1 Accuracy

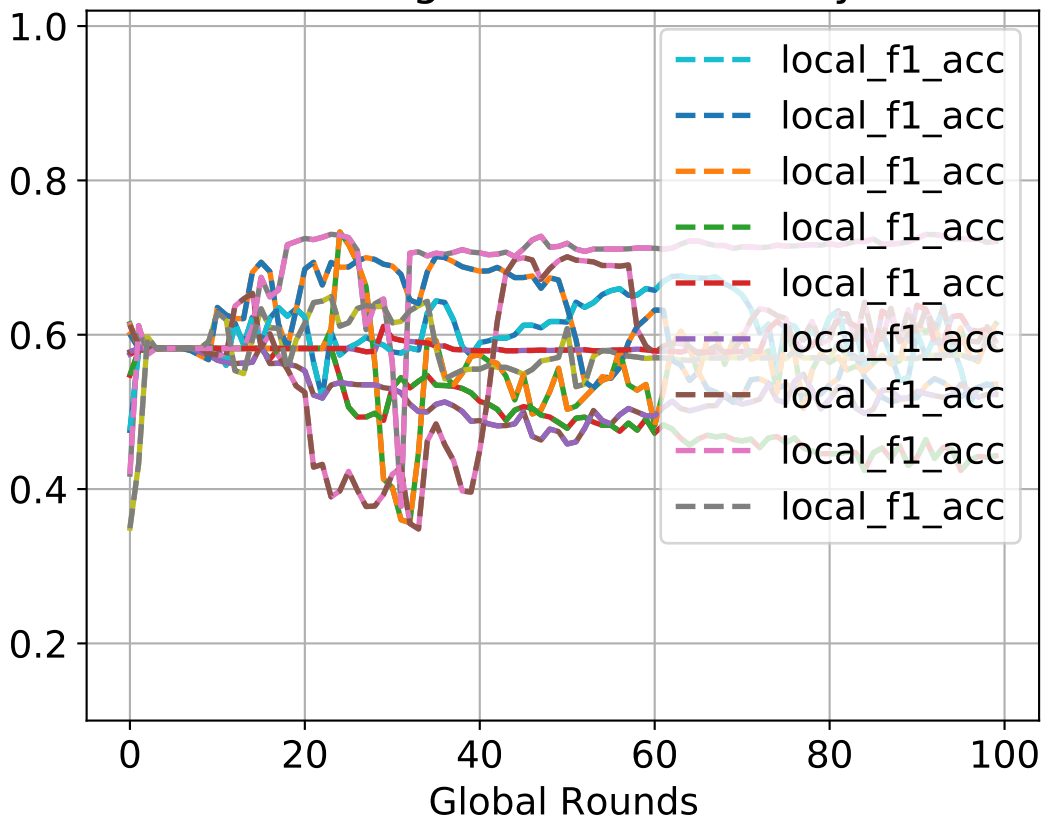

Supplement: supplementary_material [file attachment]

# Testing Loss

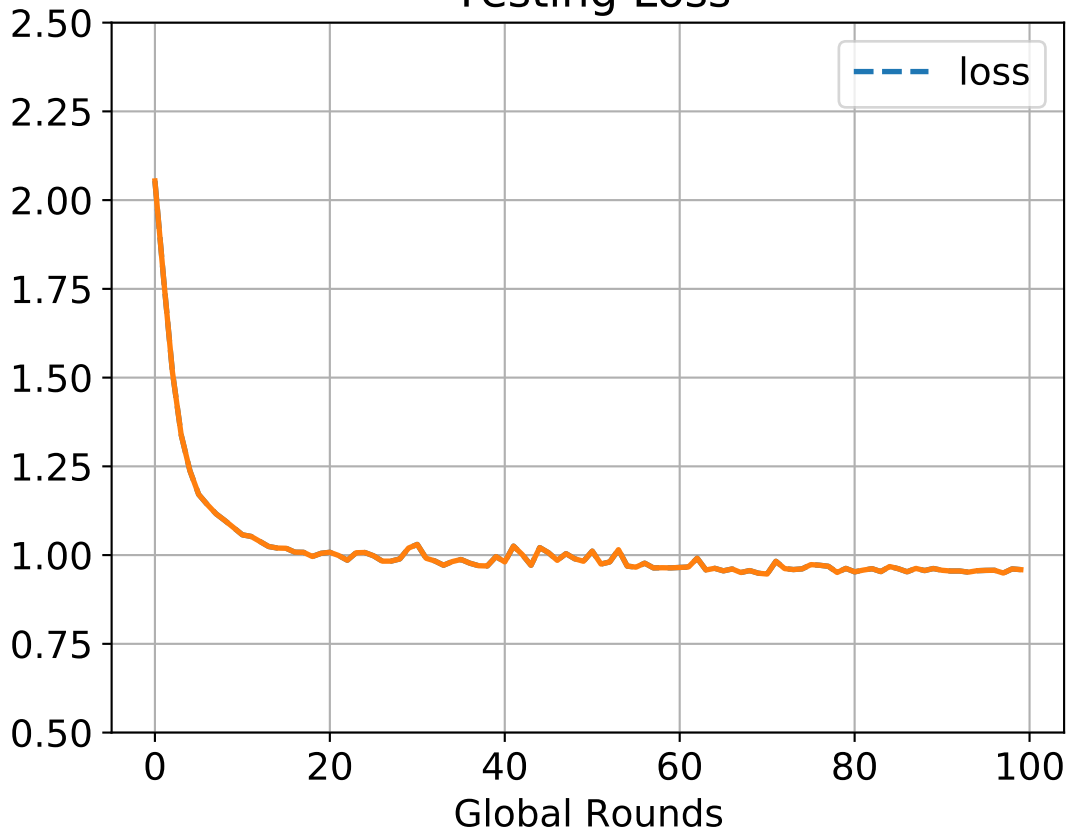

Supplement: supplementary_material [file attachment]

# Training Client Reconstruction Loss

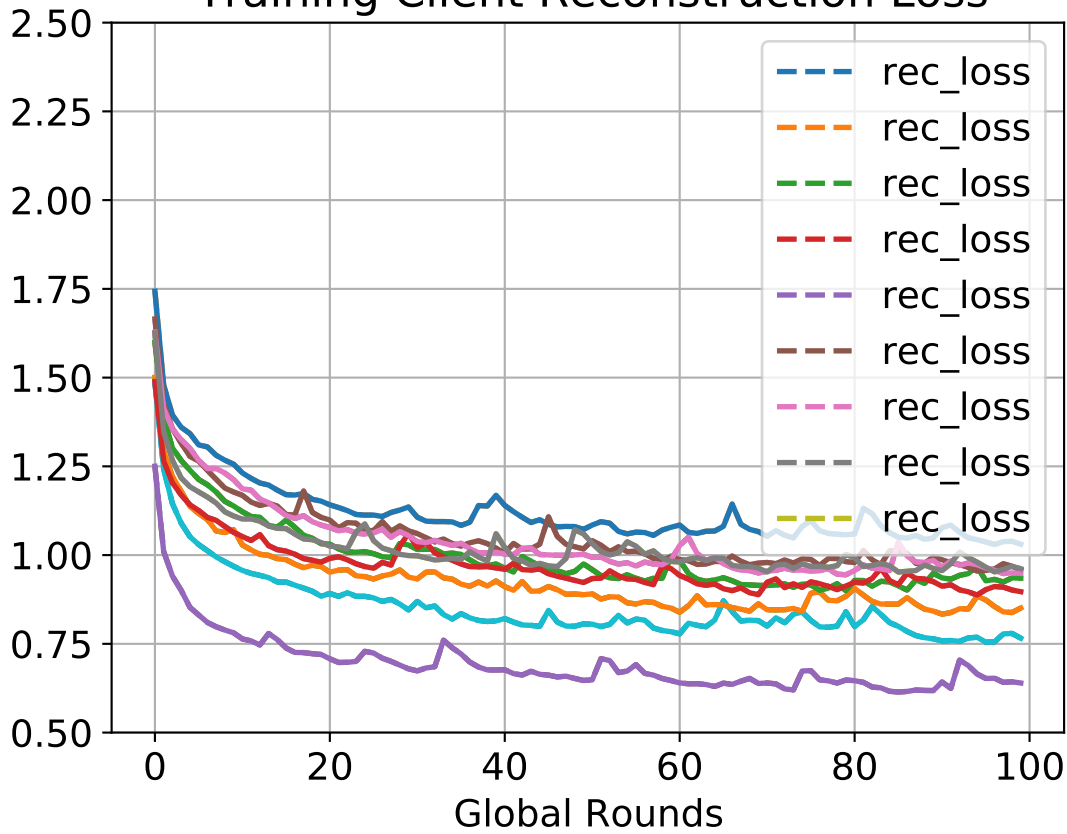

Supplement: supplementary_material [file attachment]

# AVG Clients Model (Spec-Gen) Testing Accuracy

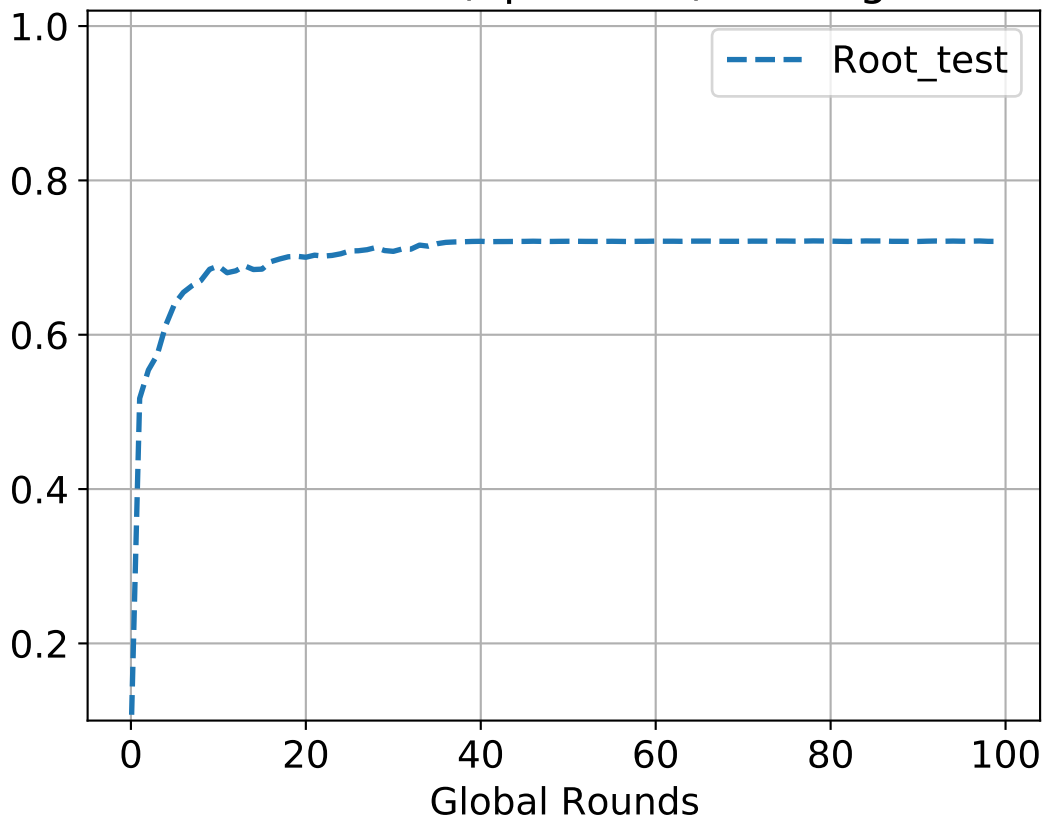

Supplement: supplementary_material [file attachment]

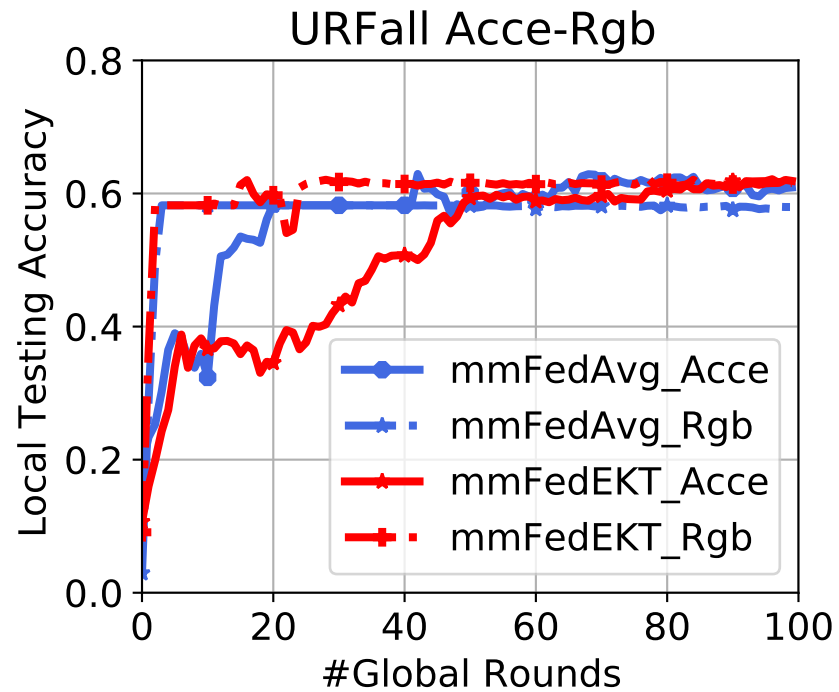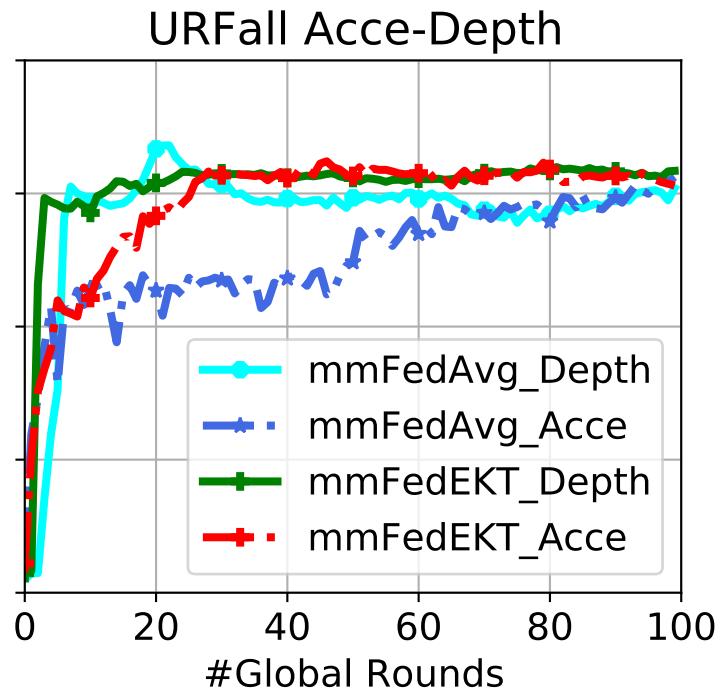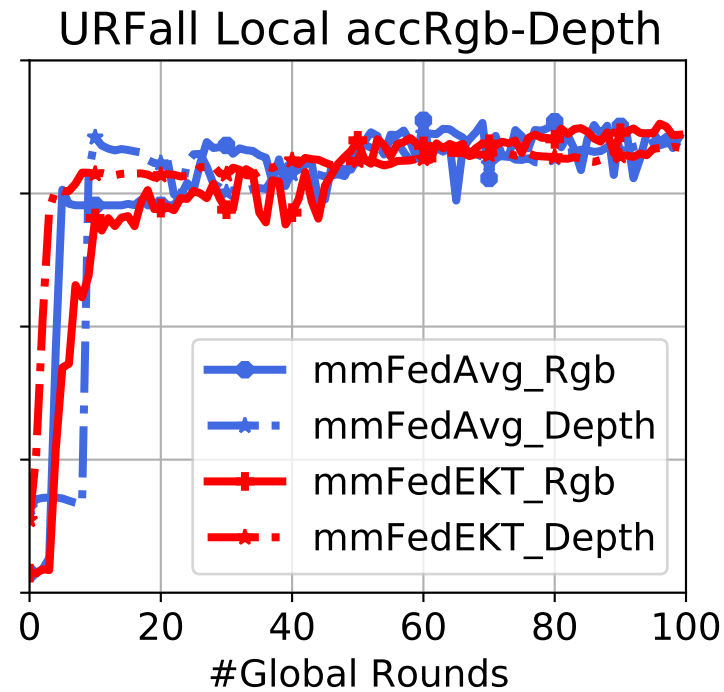

Supplement: supplementary_material [file attachment]

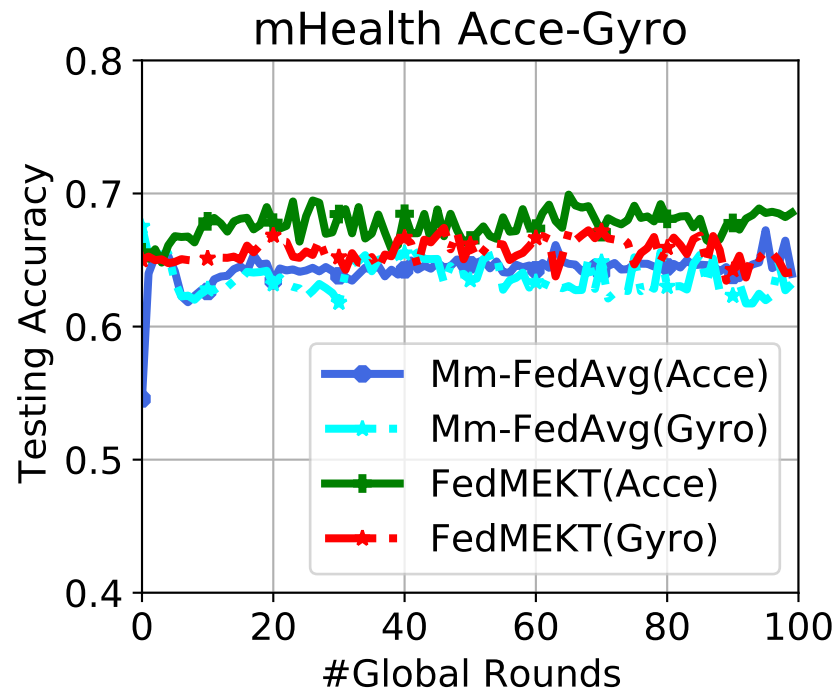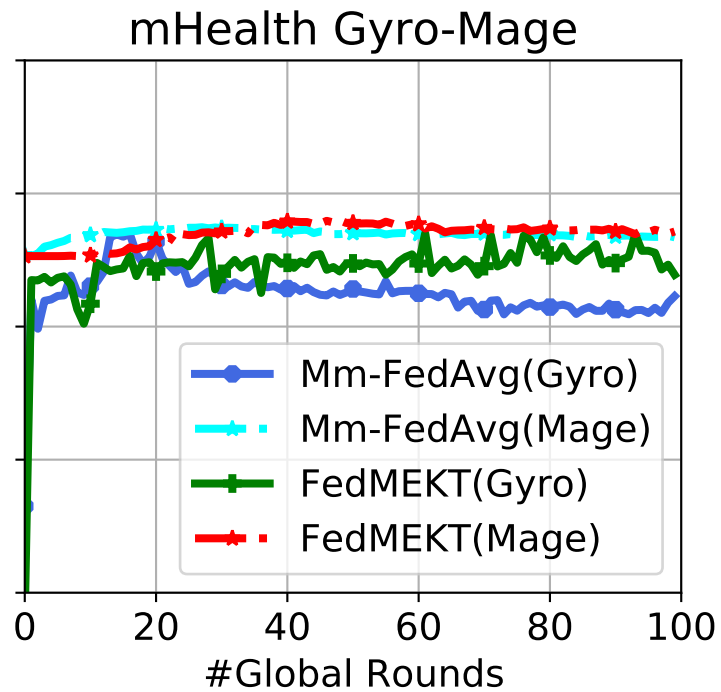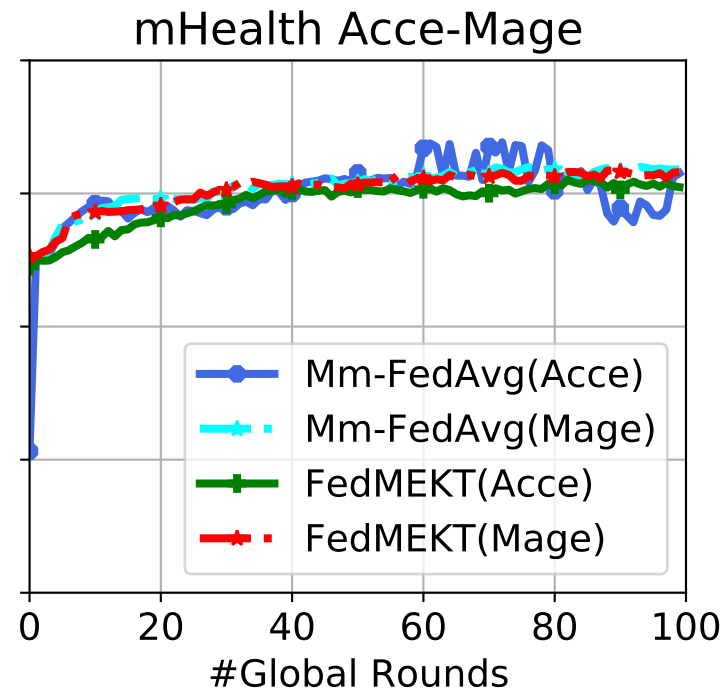

Supplement: supplementary_material [file attachment]

# Testing Loss

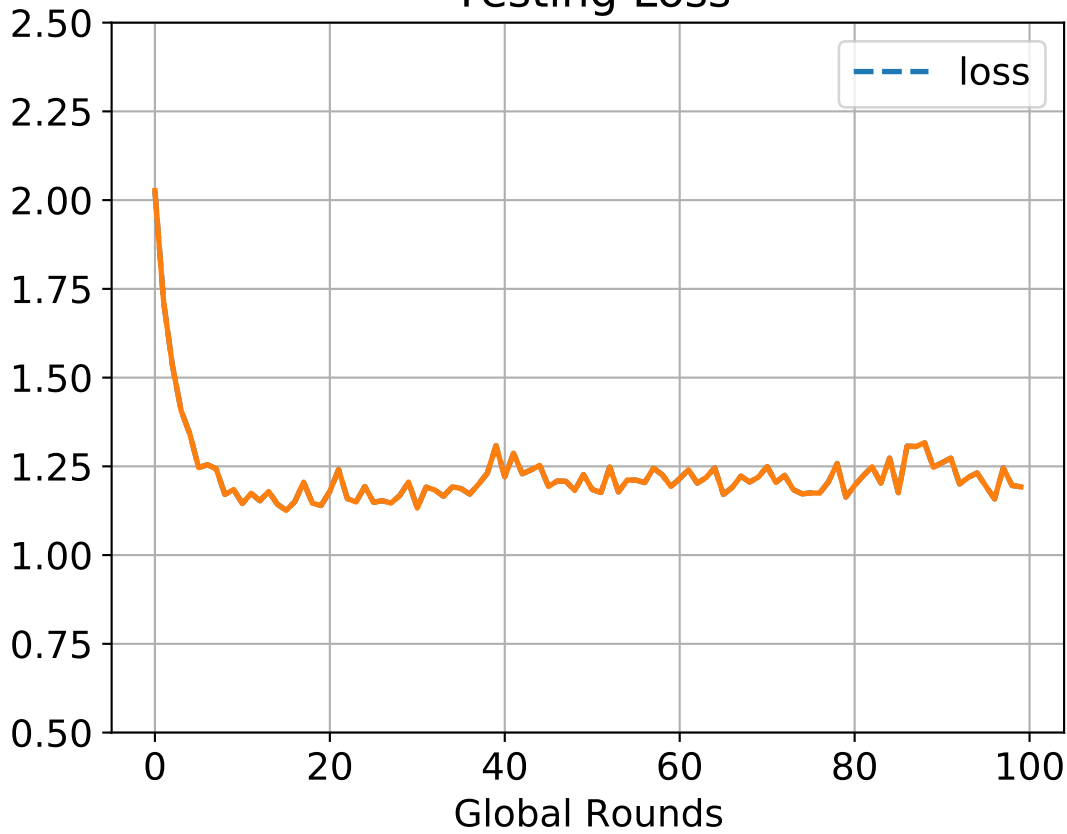

Supplement: supplementary_material [file attachment]

# Training Global Knowledge Transfer Loss

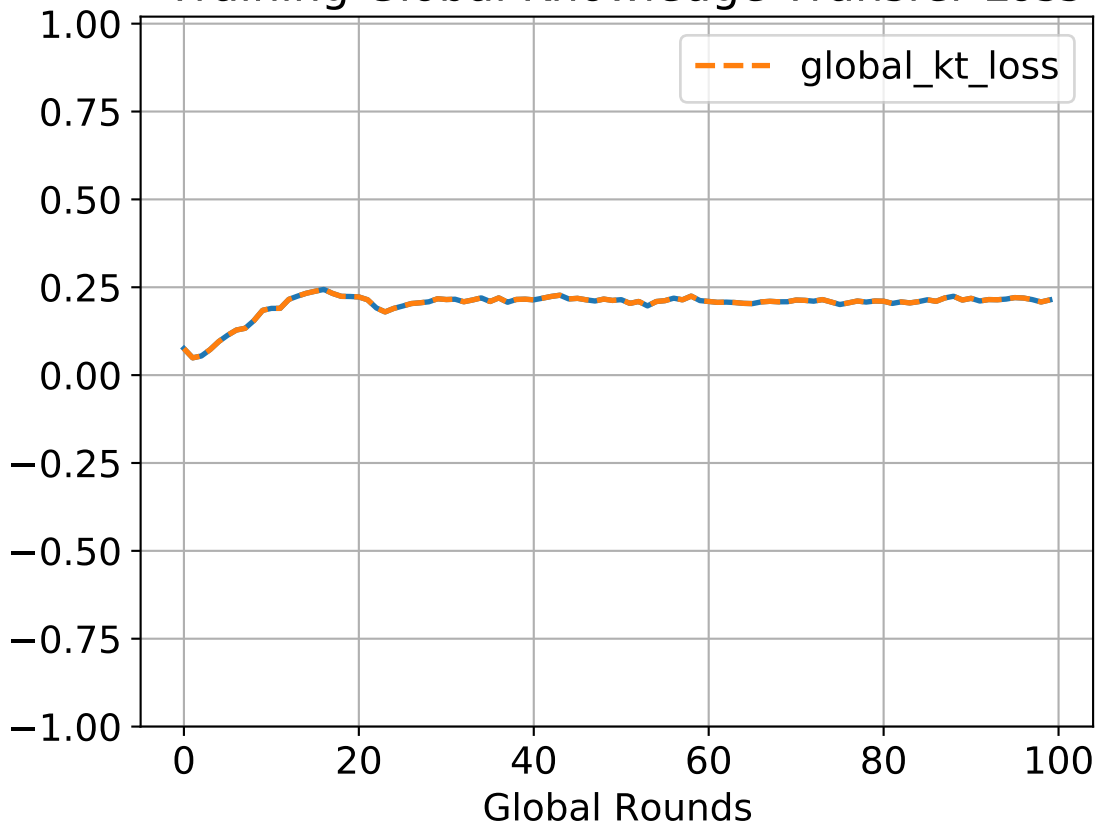

Supplement: supplementary_material [file attachment]

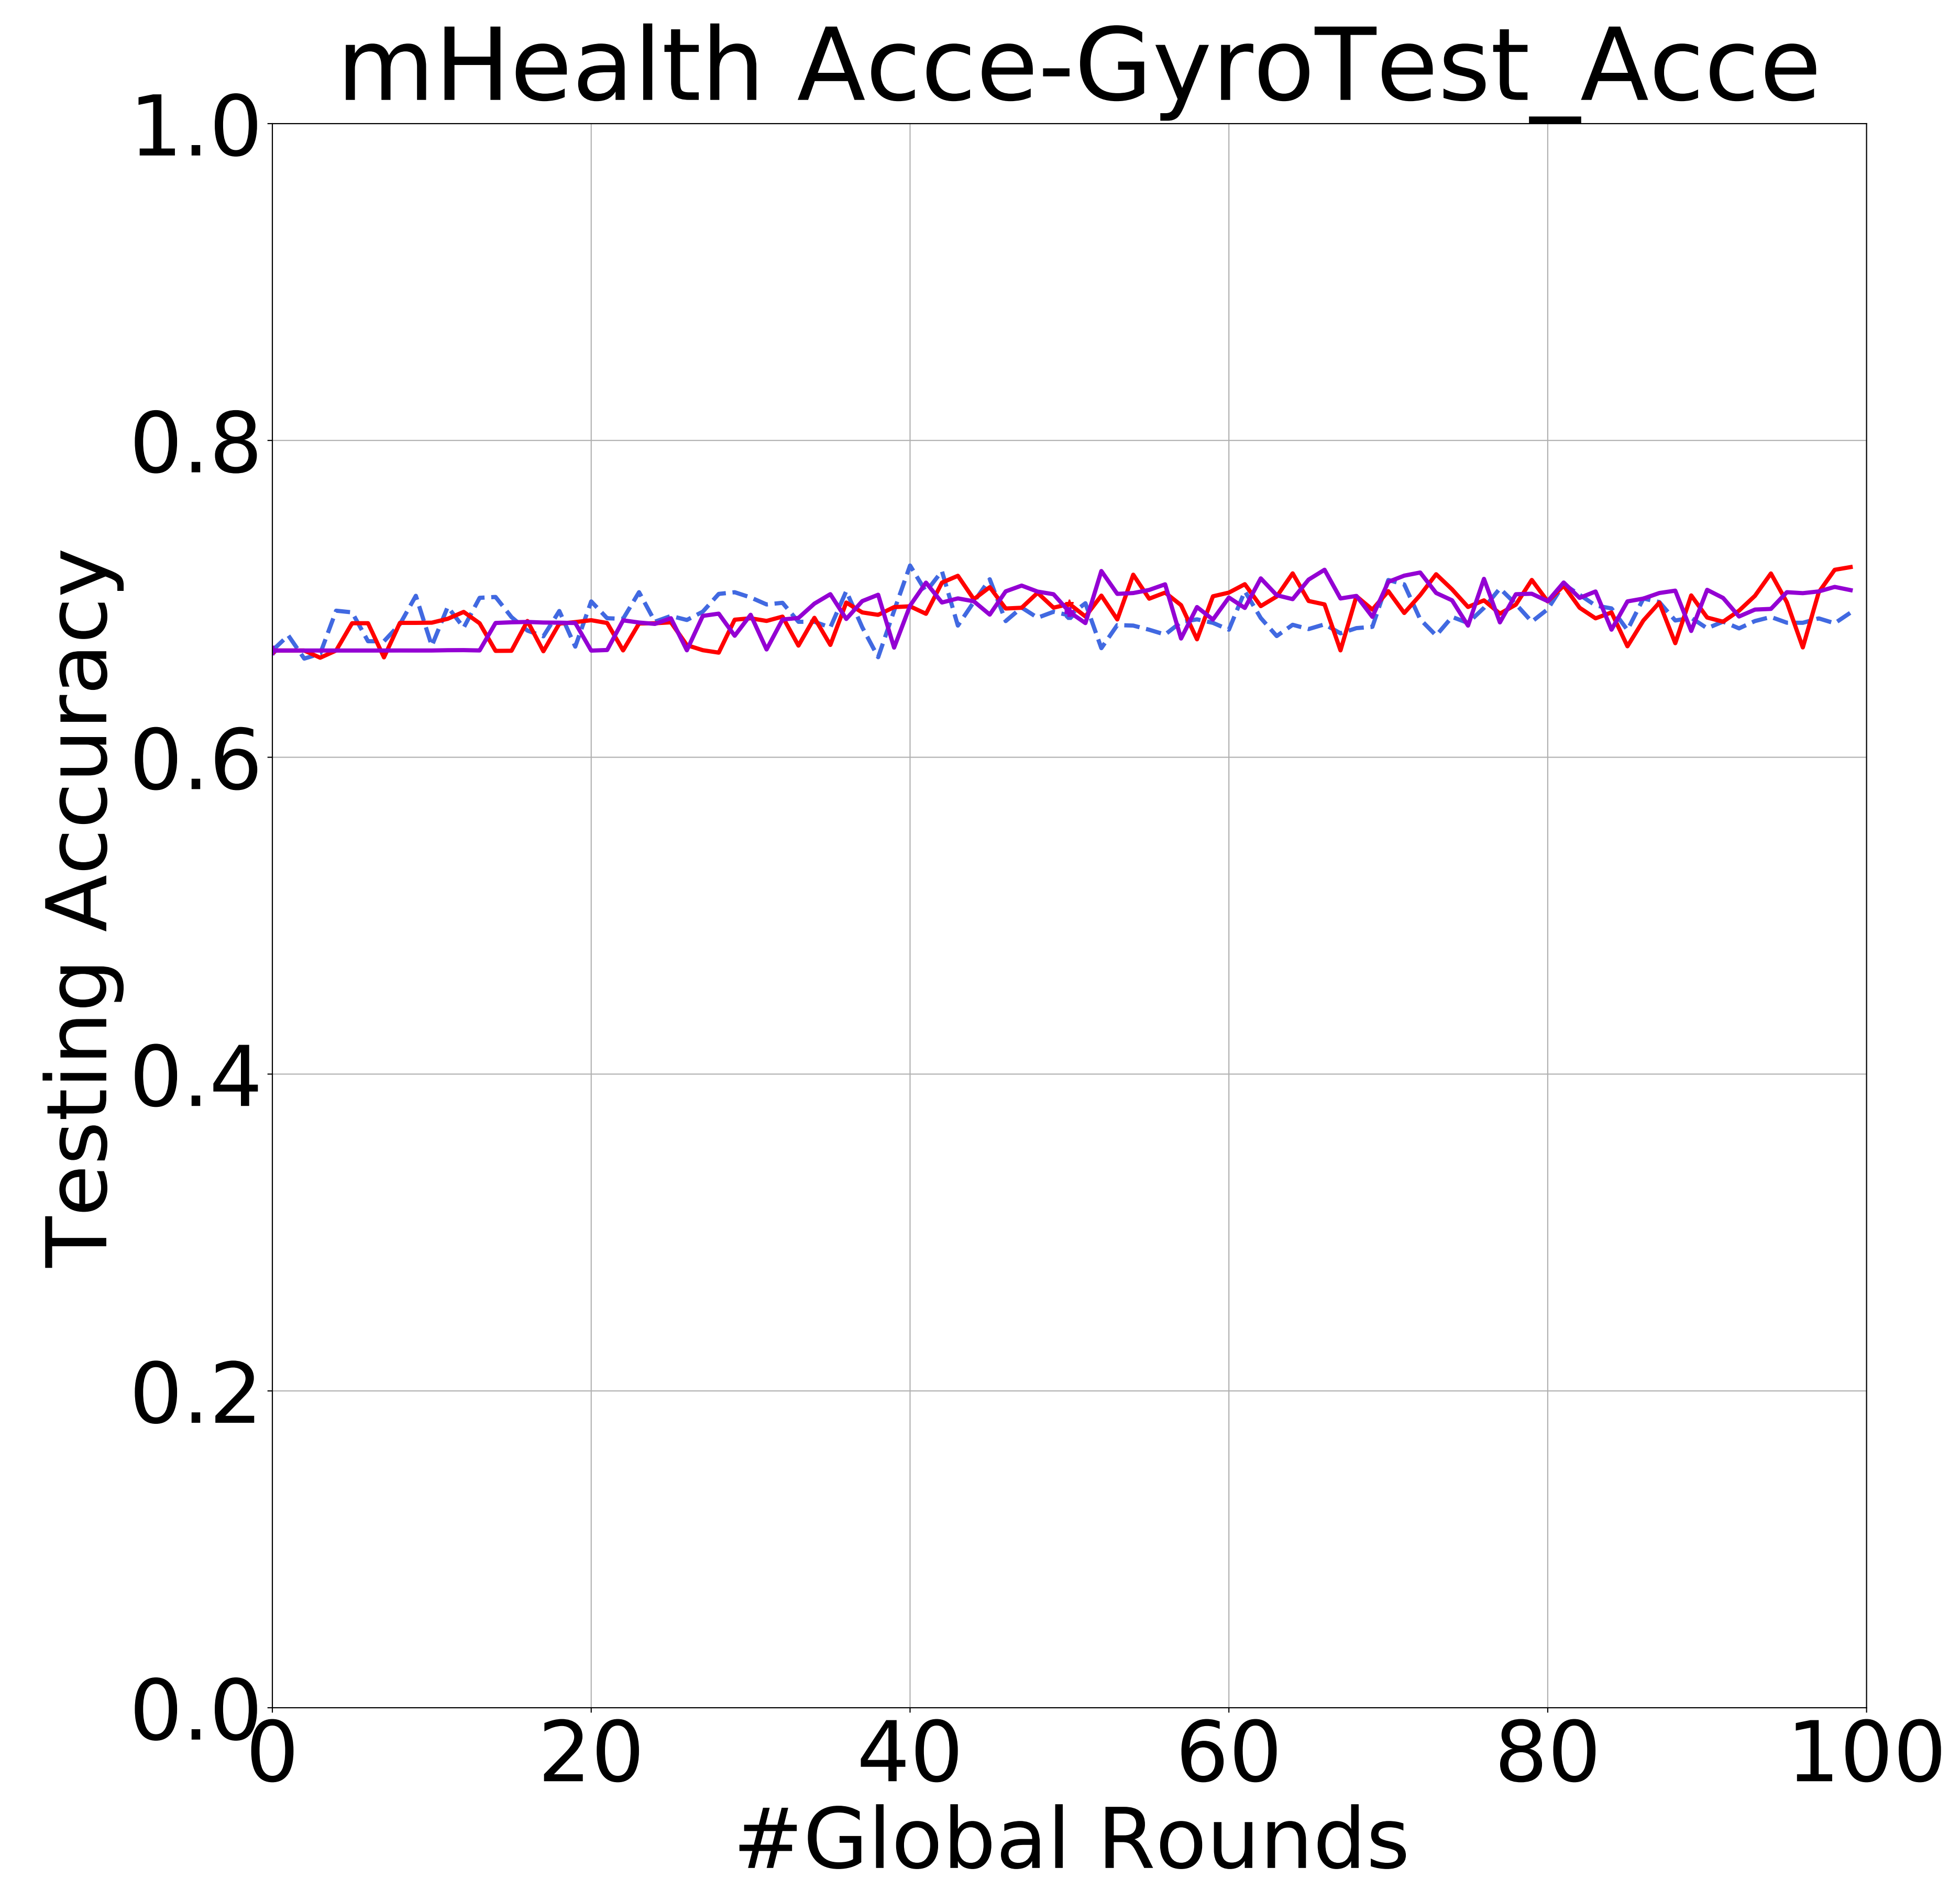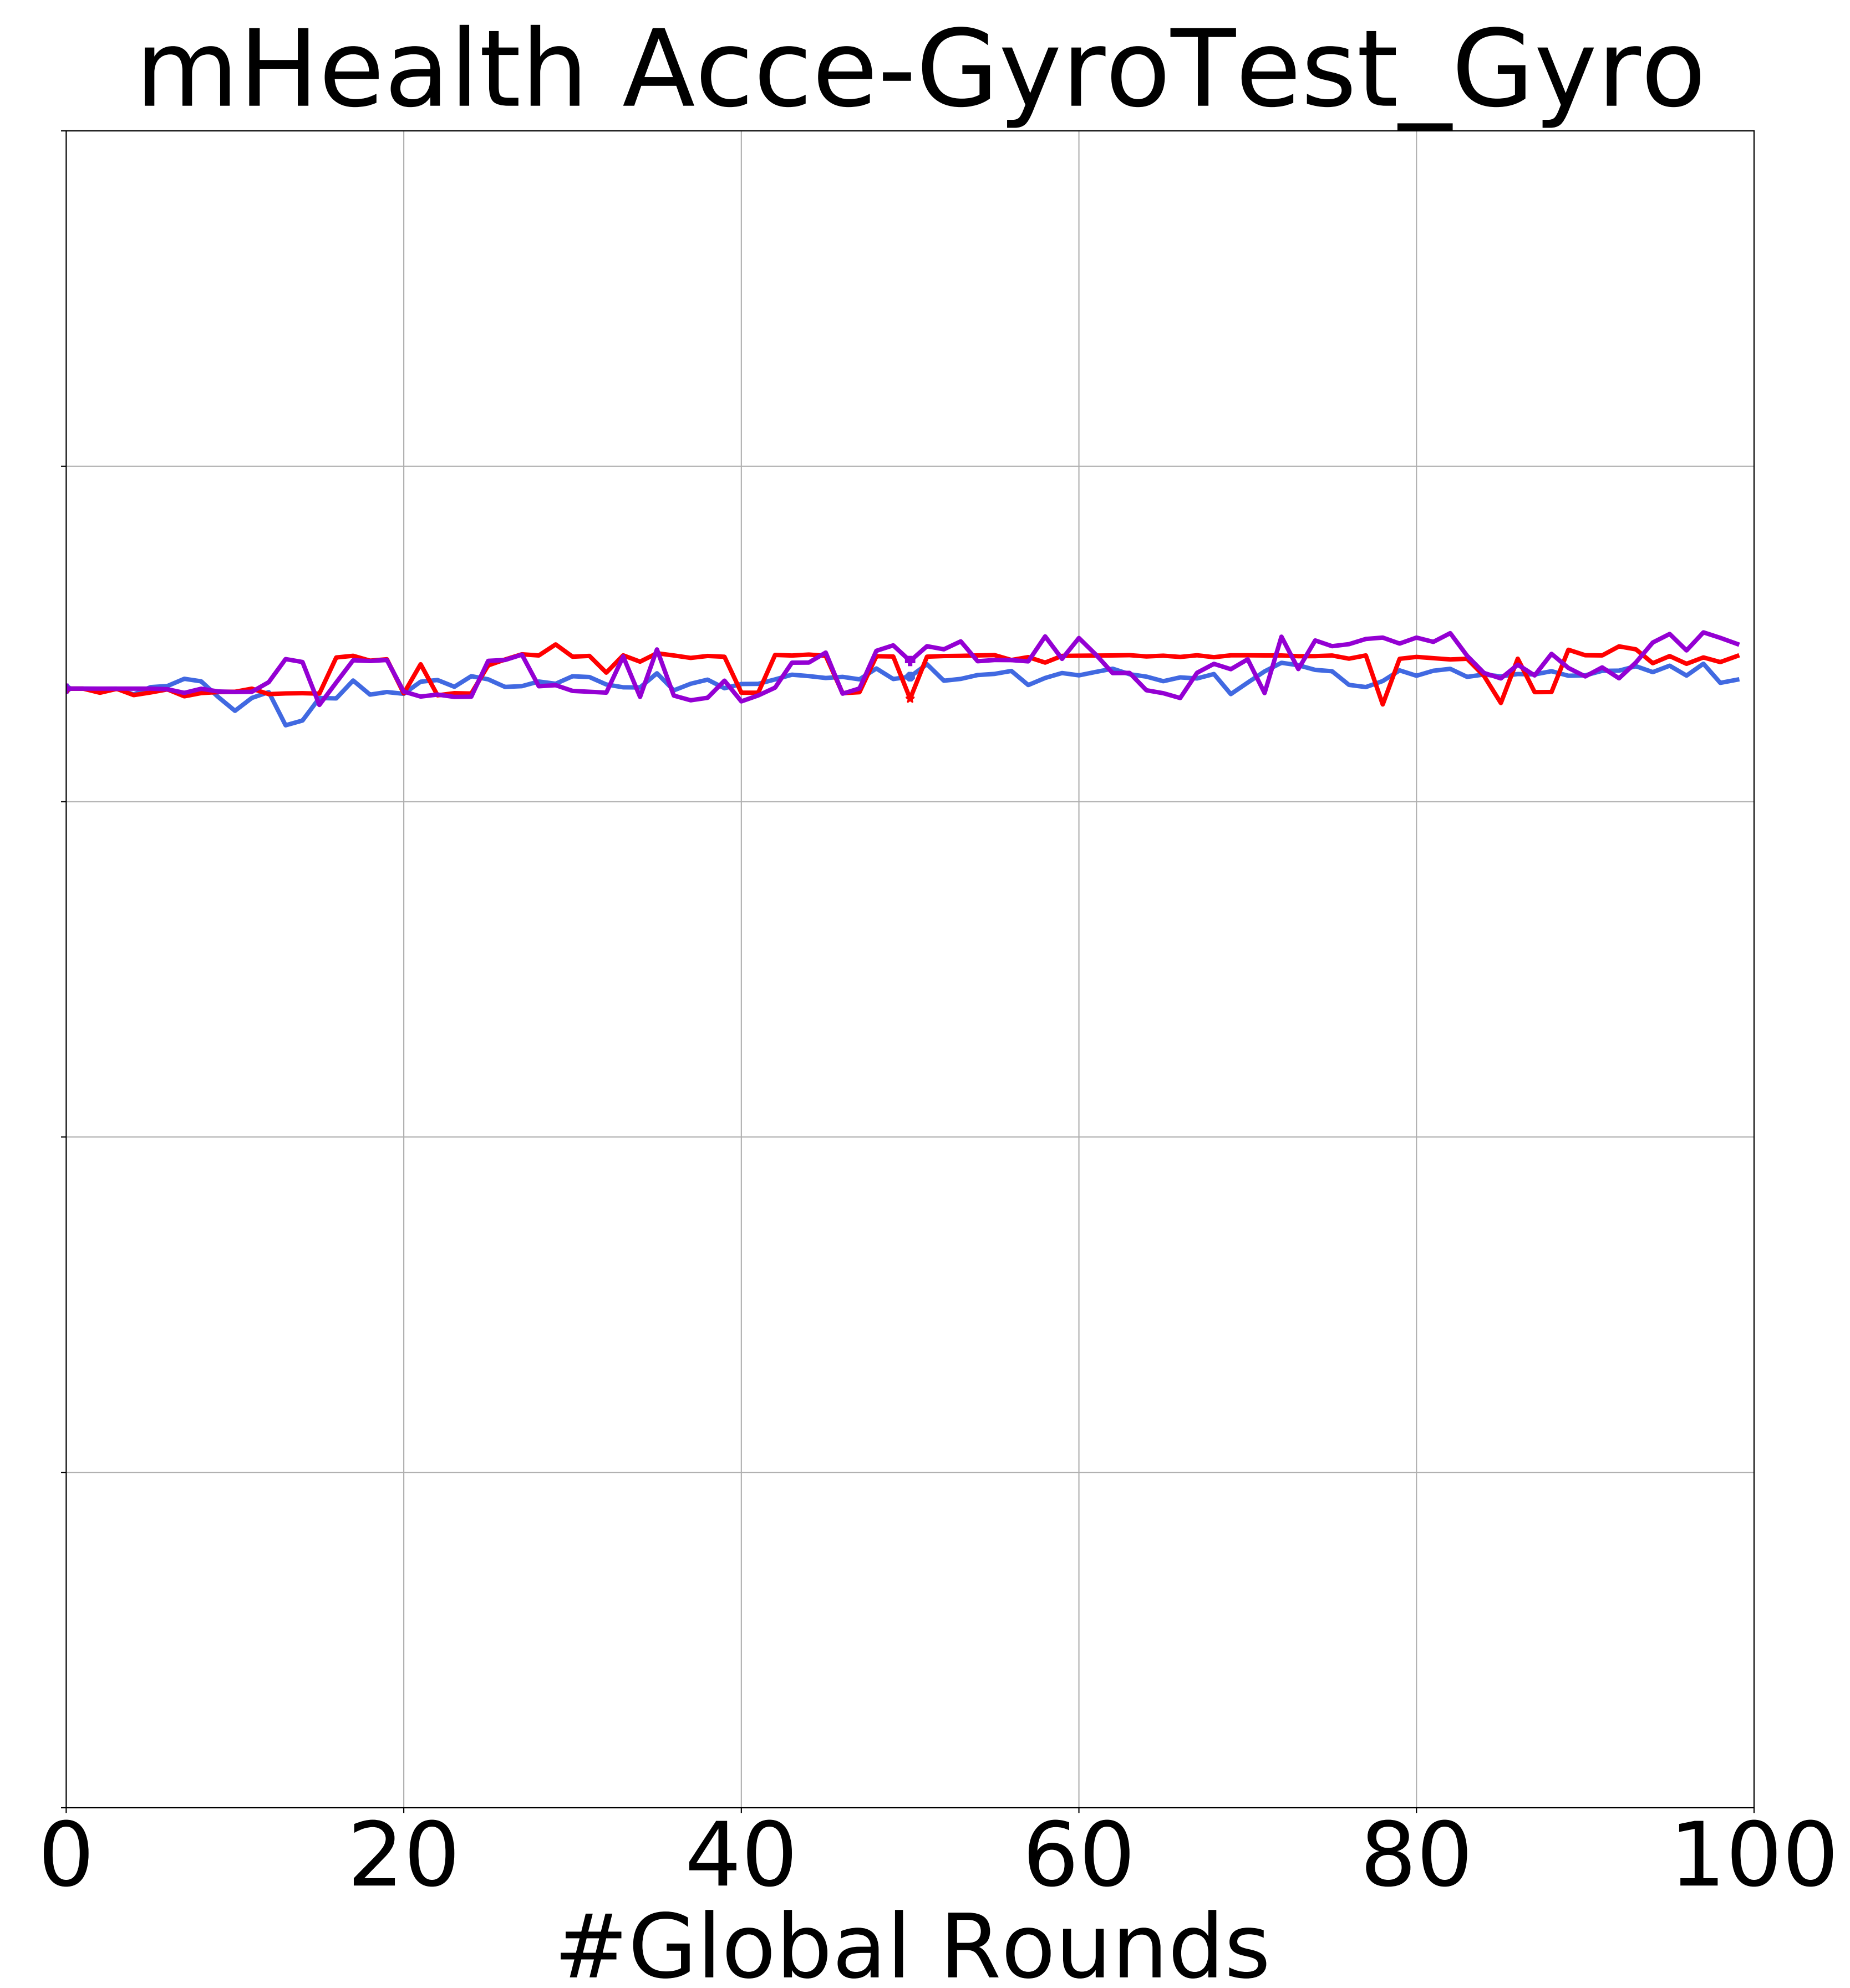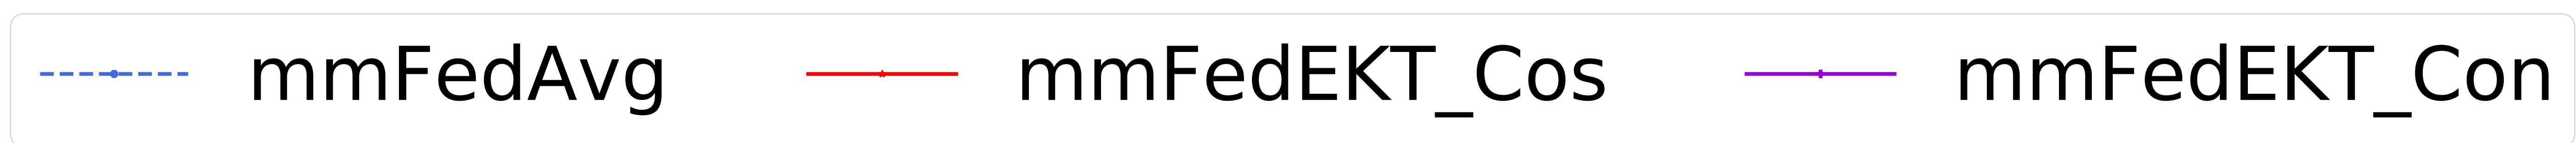

Supplement: supplementary_material [file attachment]

# Testing Local F1 Accuracy

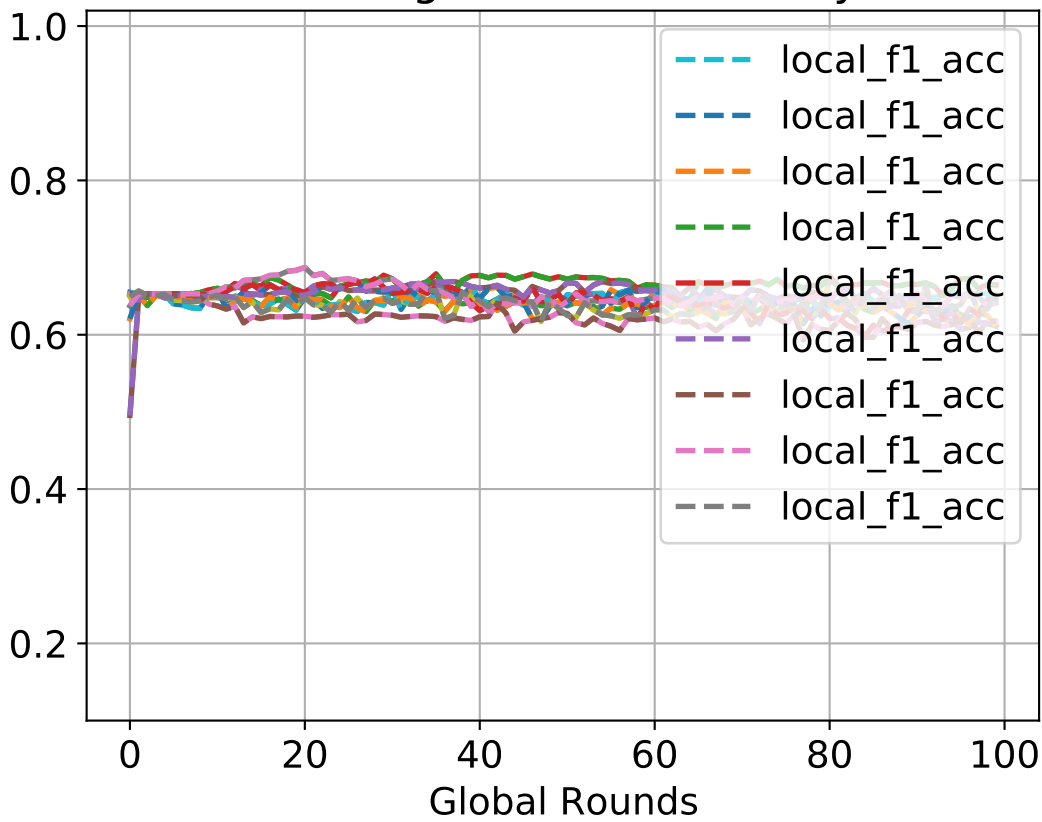

Supplement: supplementary_material [file attachment]

# AVG Clients Model (Spec-Gen) Testing Accuracy

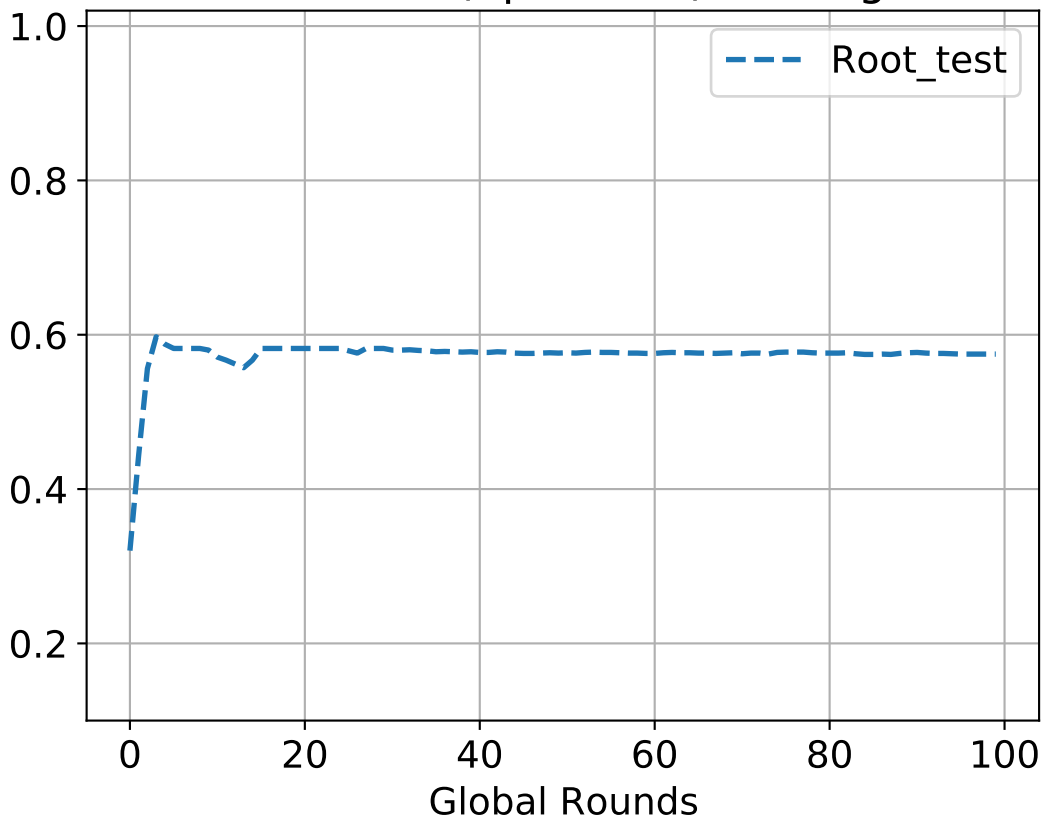

Supplement: supplementary_material [file attachment]

## Testing Local F1 Accuracy

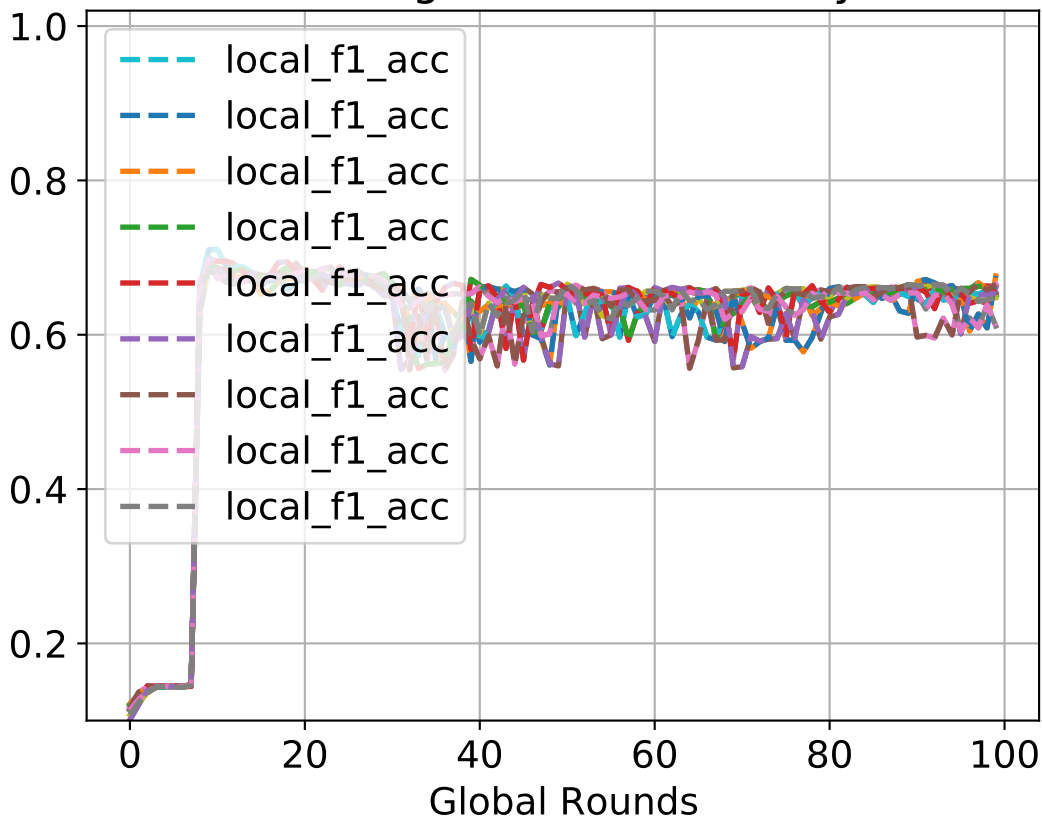

Supplement: supplementary_material [file attachment]

# Training Client Reconstruction Loss

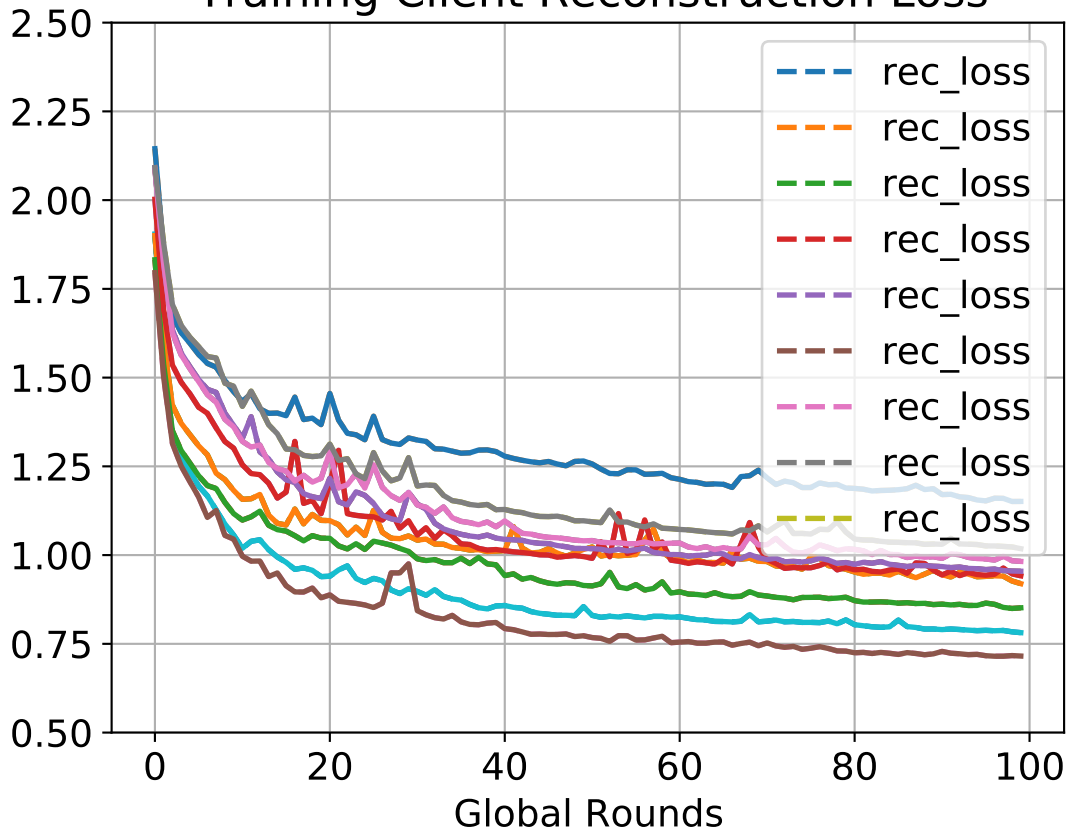

Supplement: supplementary_material [file attachment]

# opp Local AccAcce-Gyro

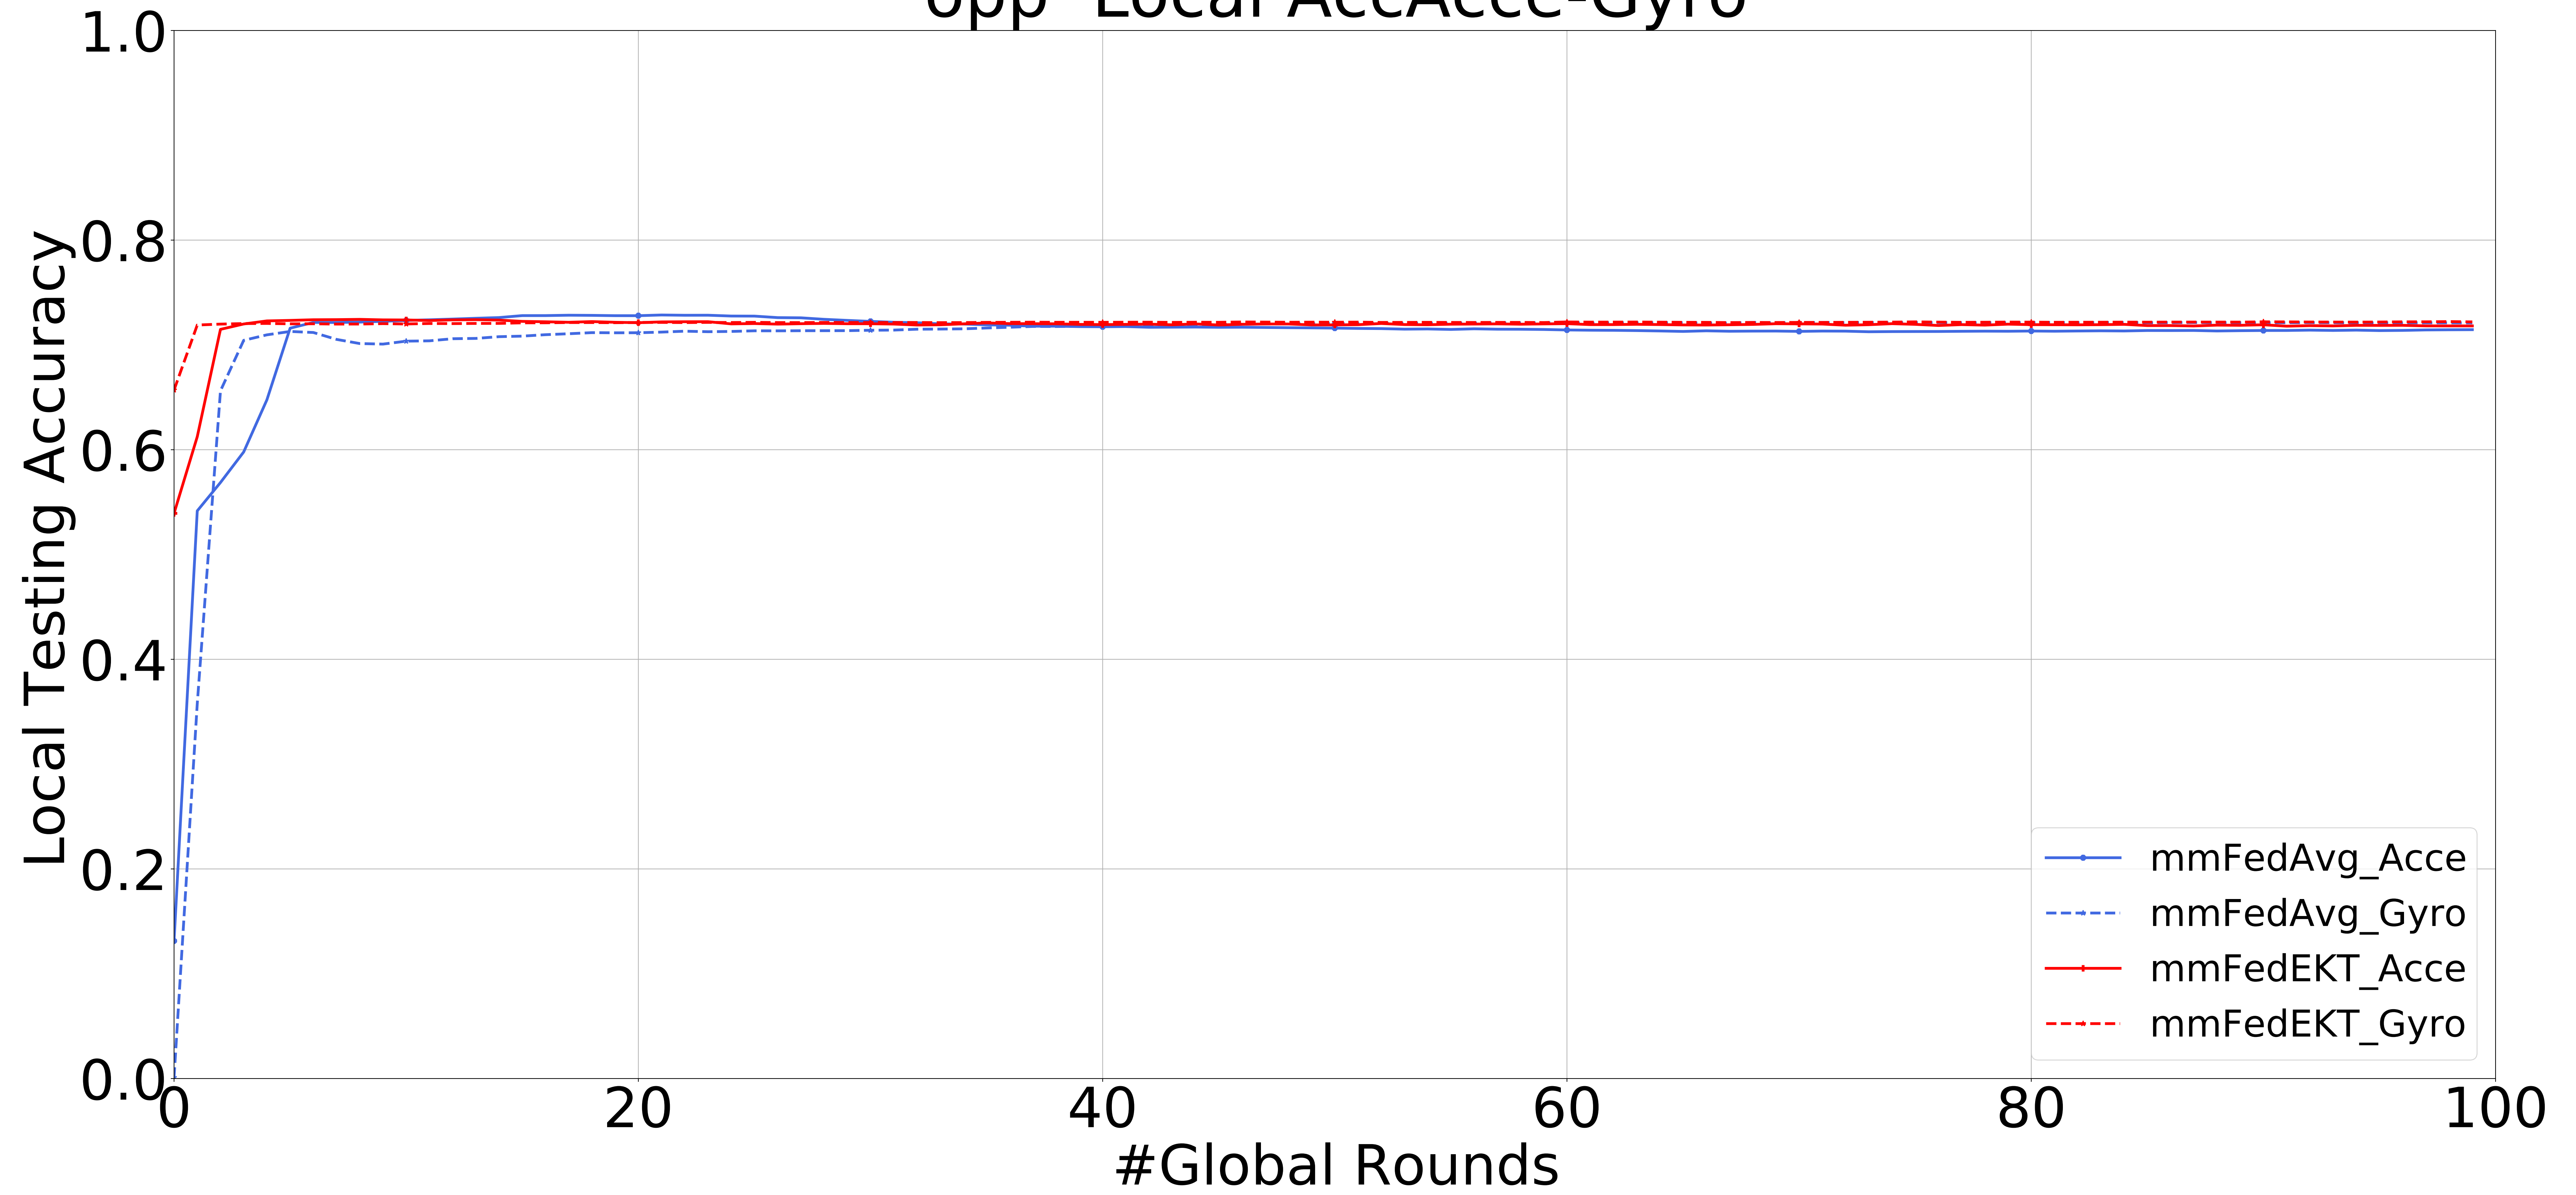

Supplement: supplementary_material [file attachment]

# Avg Testing Local F1 Accuracy

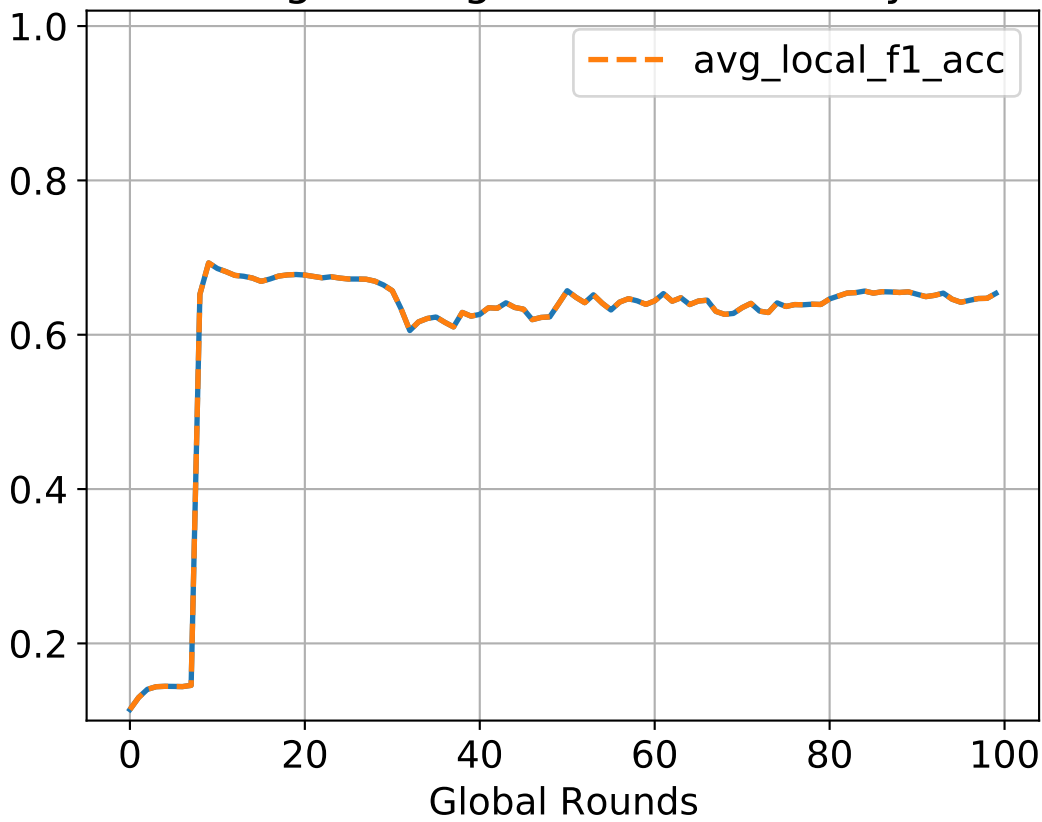

Supplement: supplementary_material [file attachment]

# Avg Testing Local F1 Accuracy

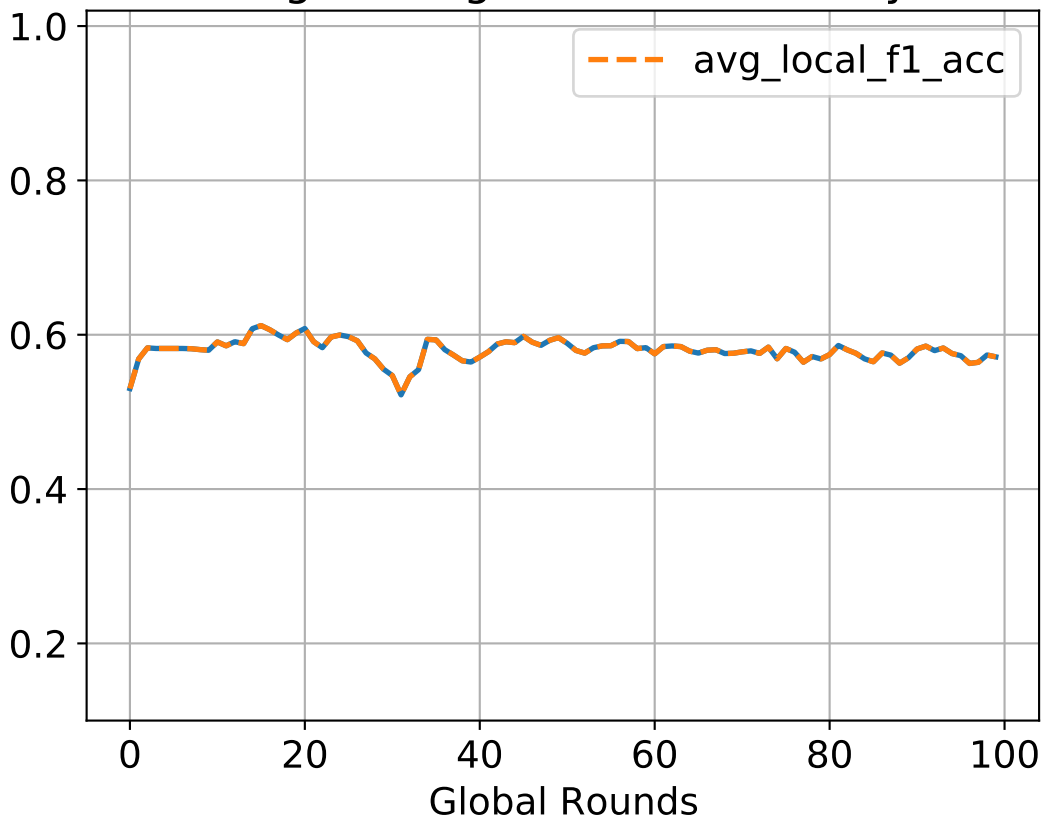

Supplement: supplementary_material [file attachment]

# Testing Loss

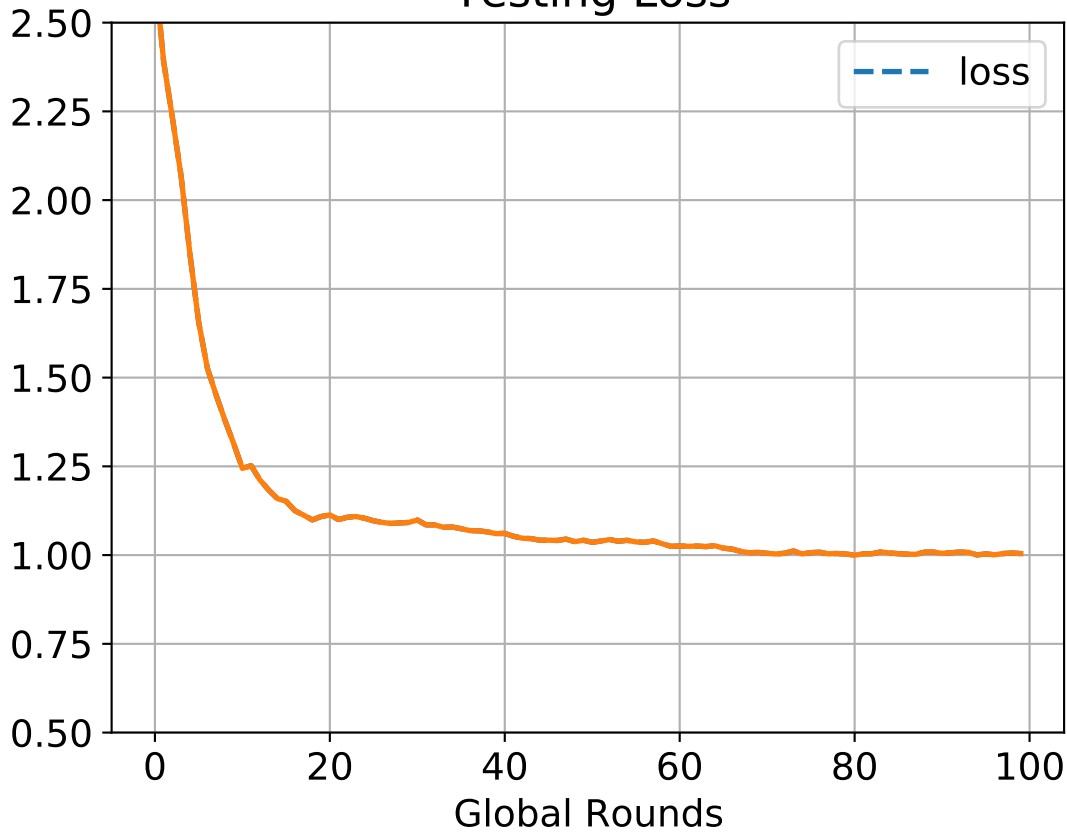

Supplement: supplementary_material [file attachment]

# AVG Clients Model (Spec-Gen) Testing Accuracy

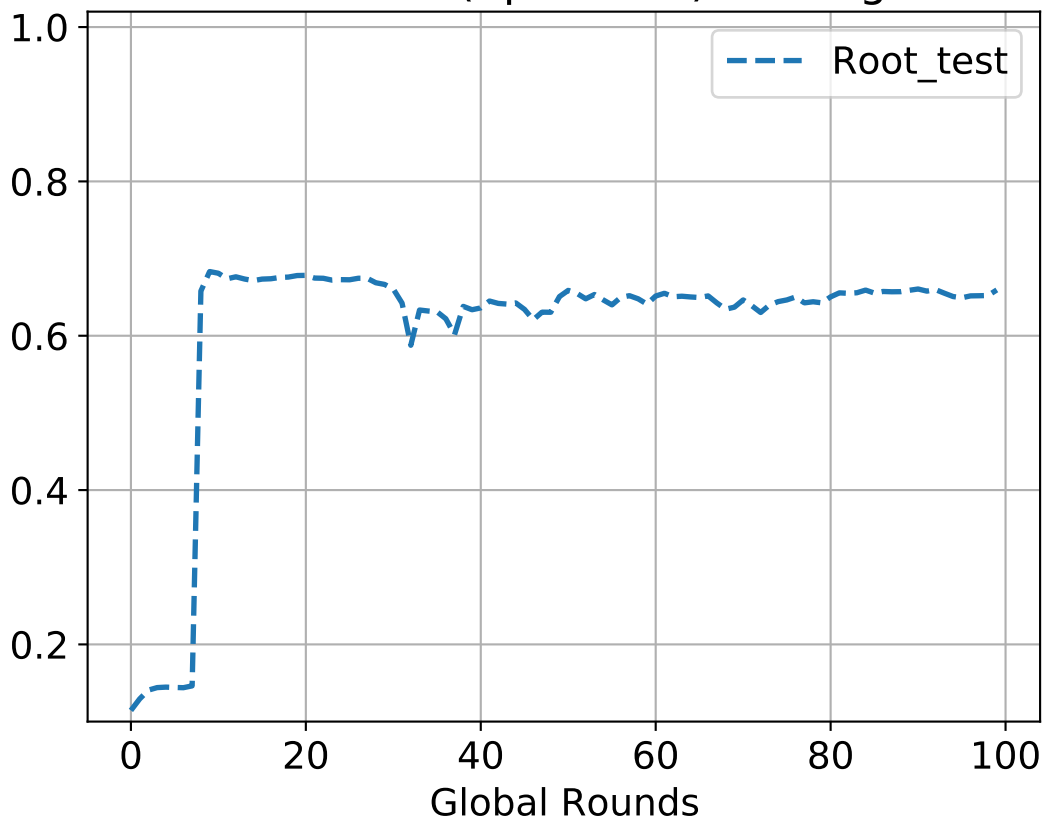

Supplement: supplementary_material [file attachment]

## Training Client Knowledge Transfer Loss

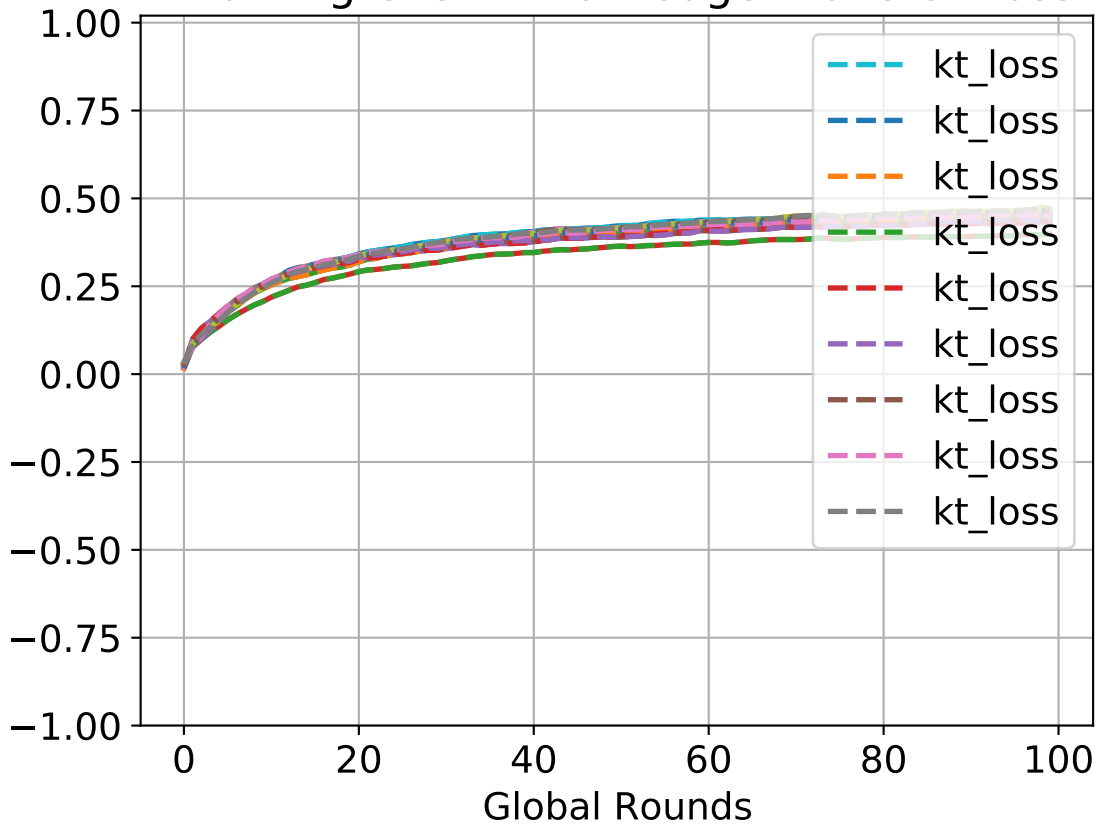

Supplement: supplementary_material [file attachment]

## Training Client Knowledge Transfer Loss

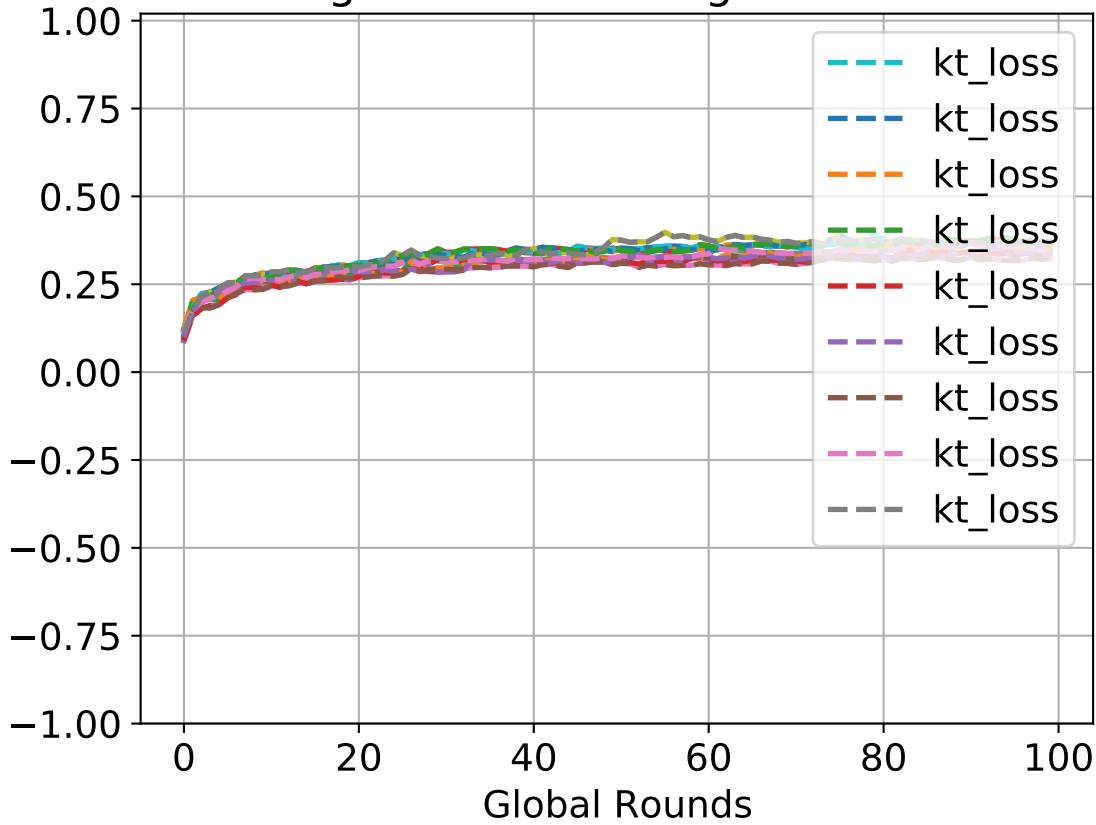

Supplement: supplementary_material [file attachment]

# Avg Testing Local F1 Accuracy

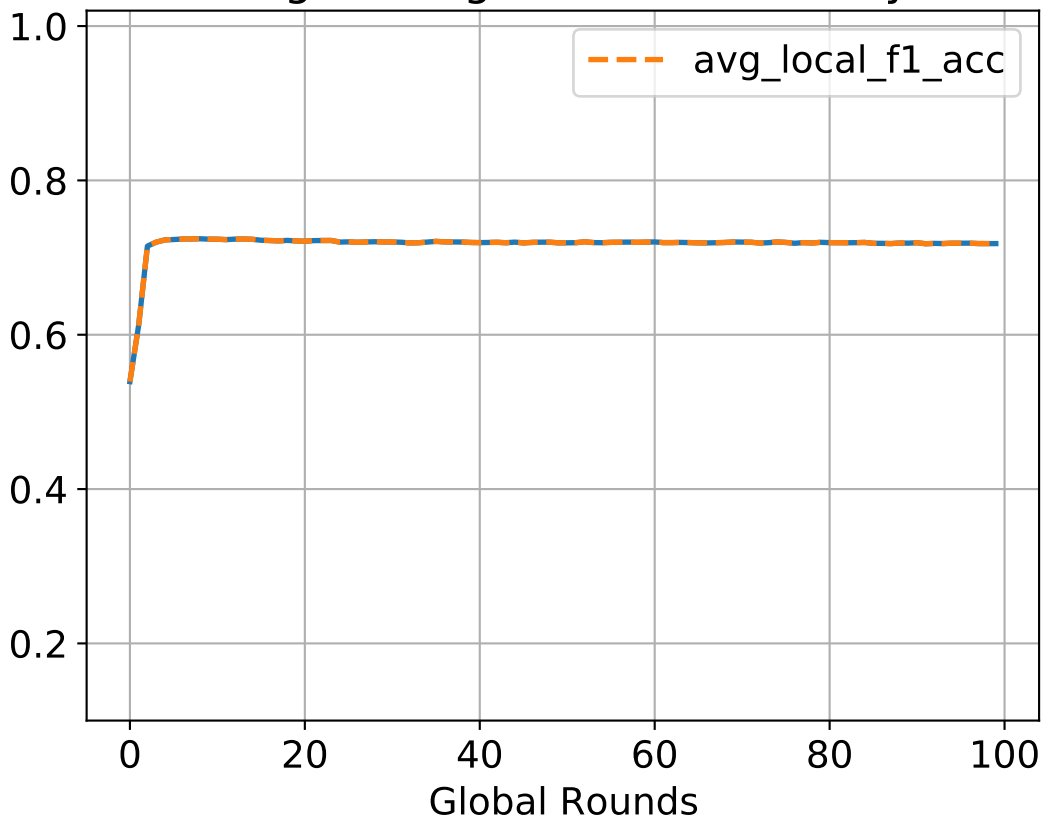

Supplement: supplementary_material [file attachment]

# AVG Clients Model (Spec-Gen) Testing Accuracy

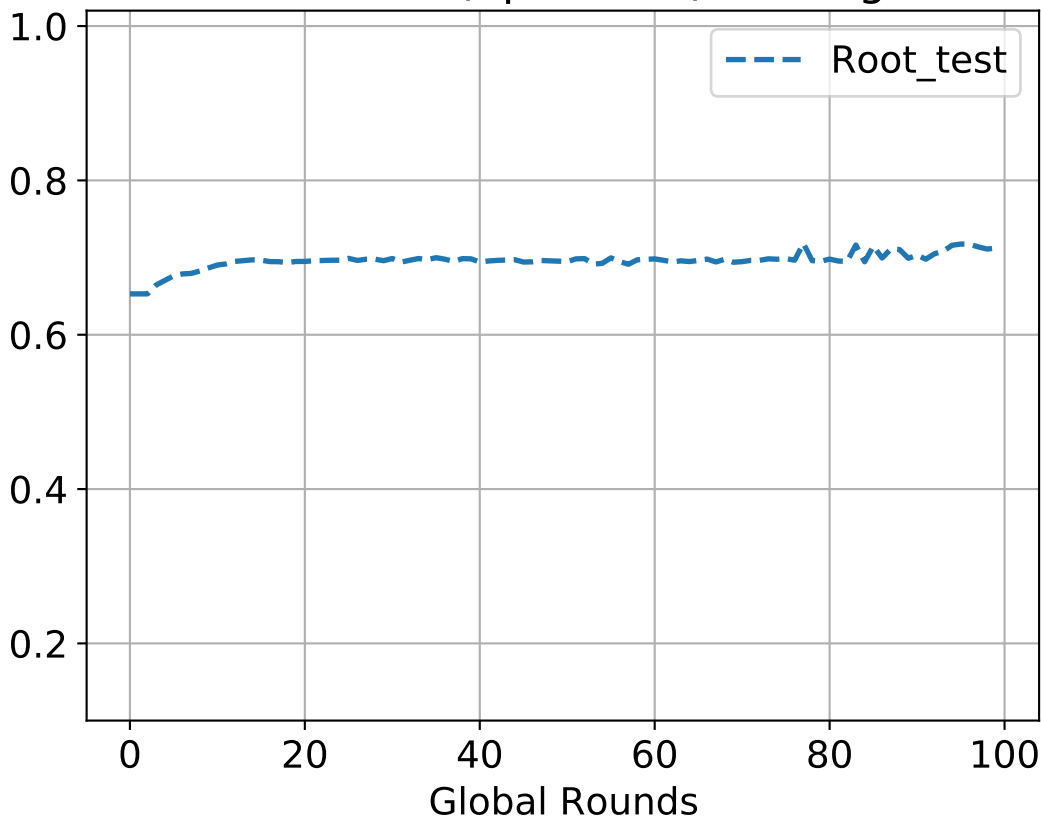

Supplement: supplementary_material [file attachment]

# Training Client Knowledge Transfer Loss

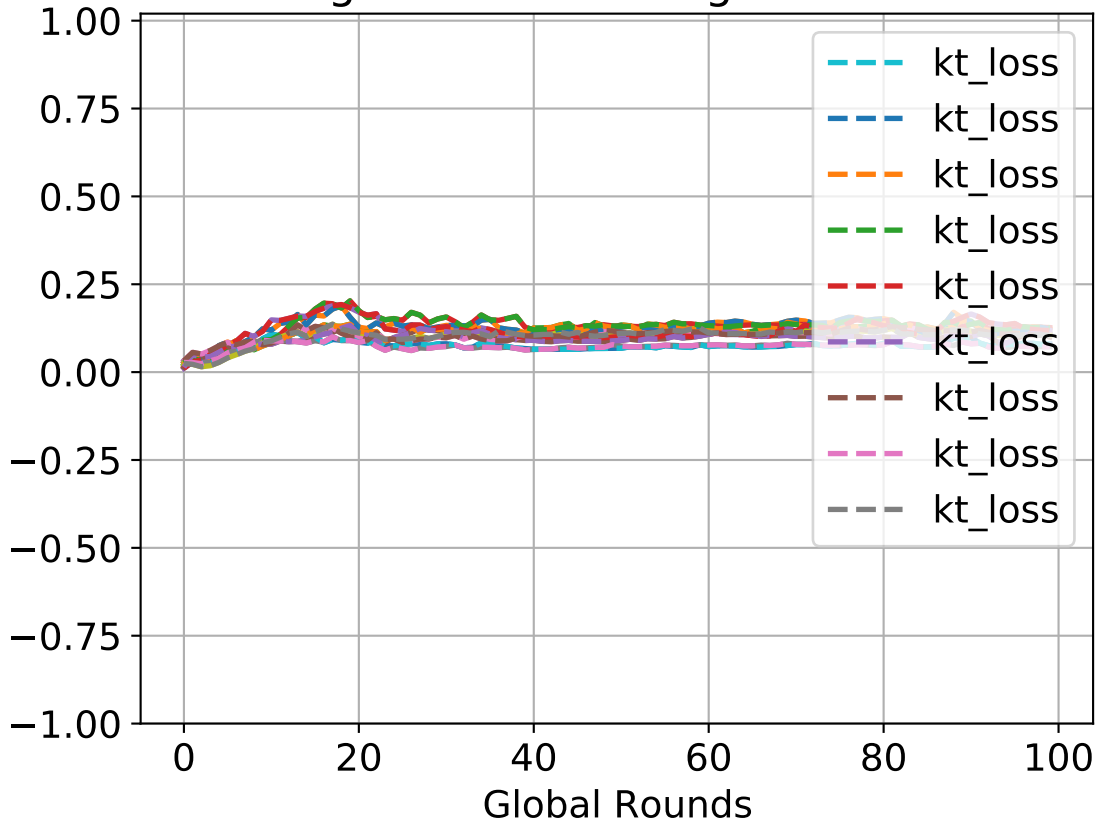

Supplement: supplementary_material [file attachment]

# Training Global Knowledge Transfer Loss

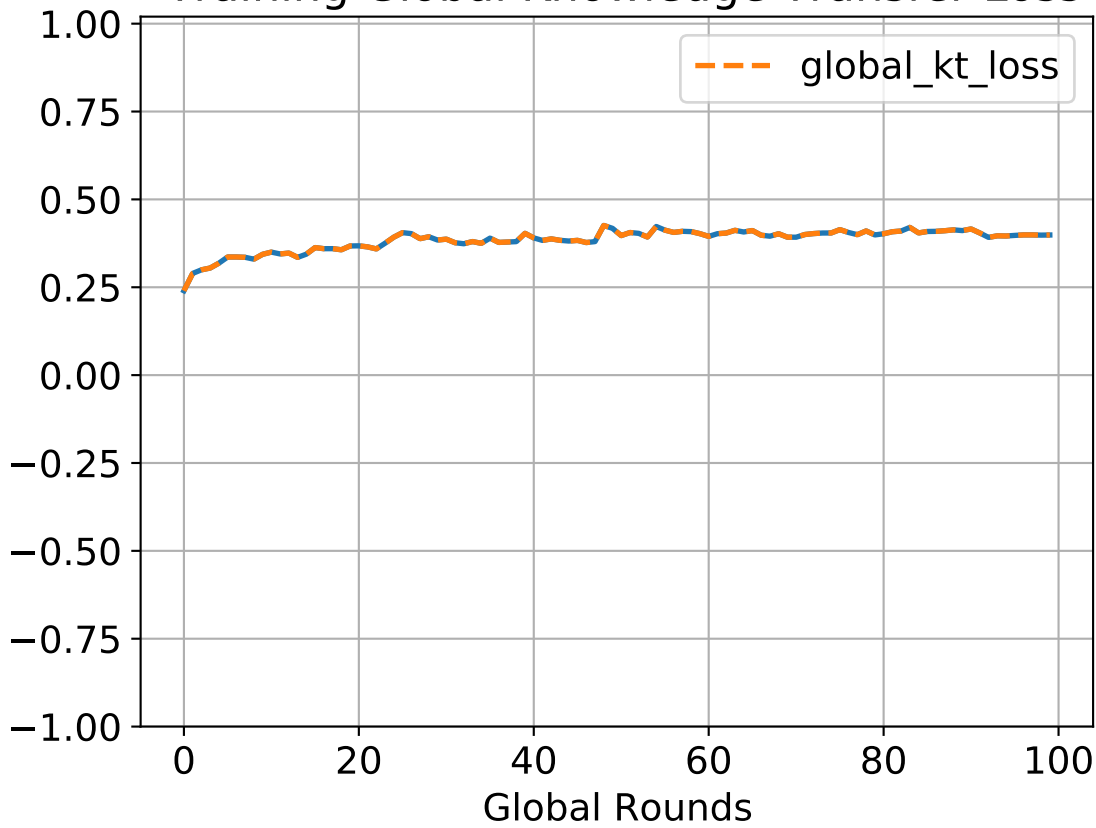

Supplement: supplementary_material [file attachment]

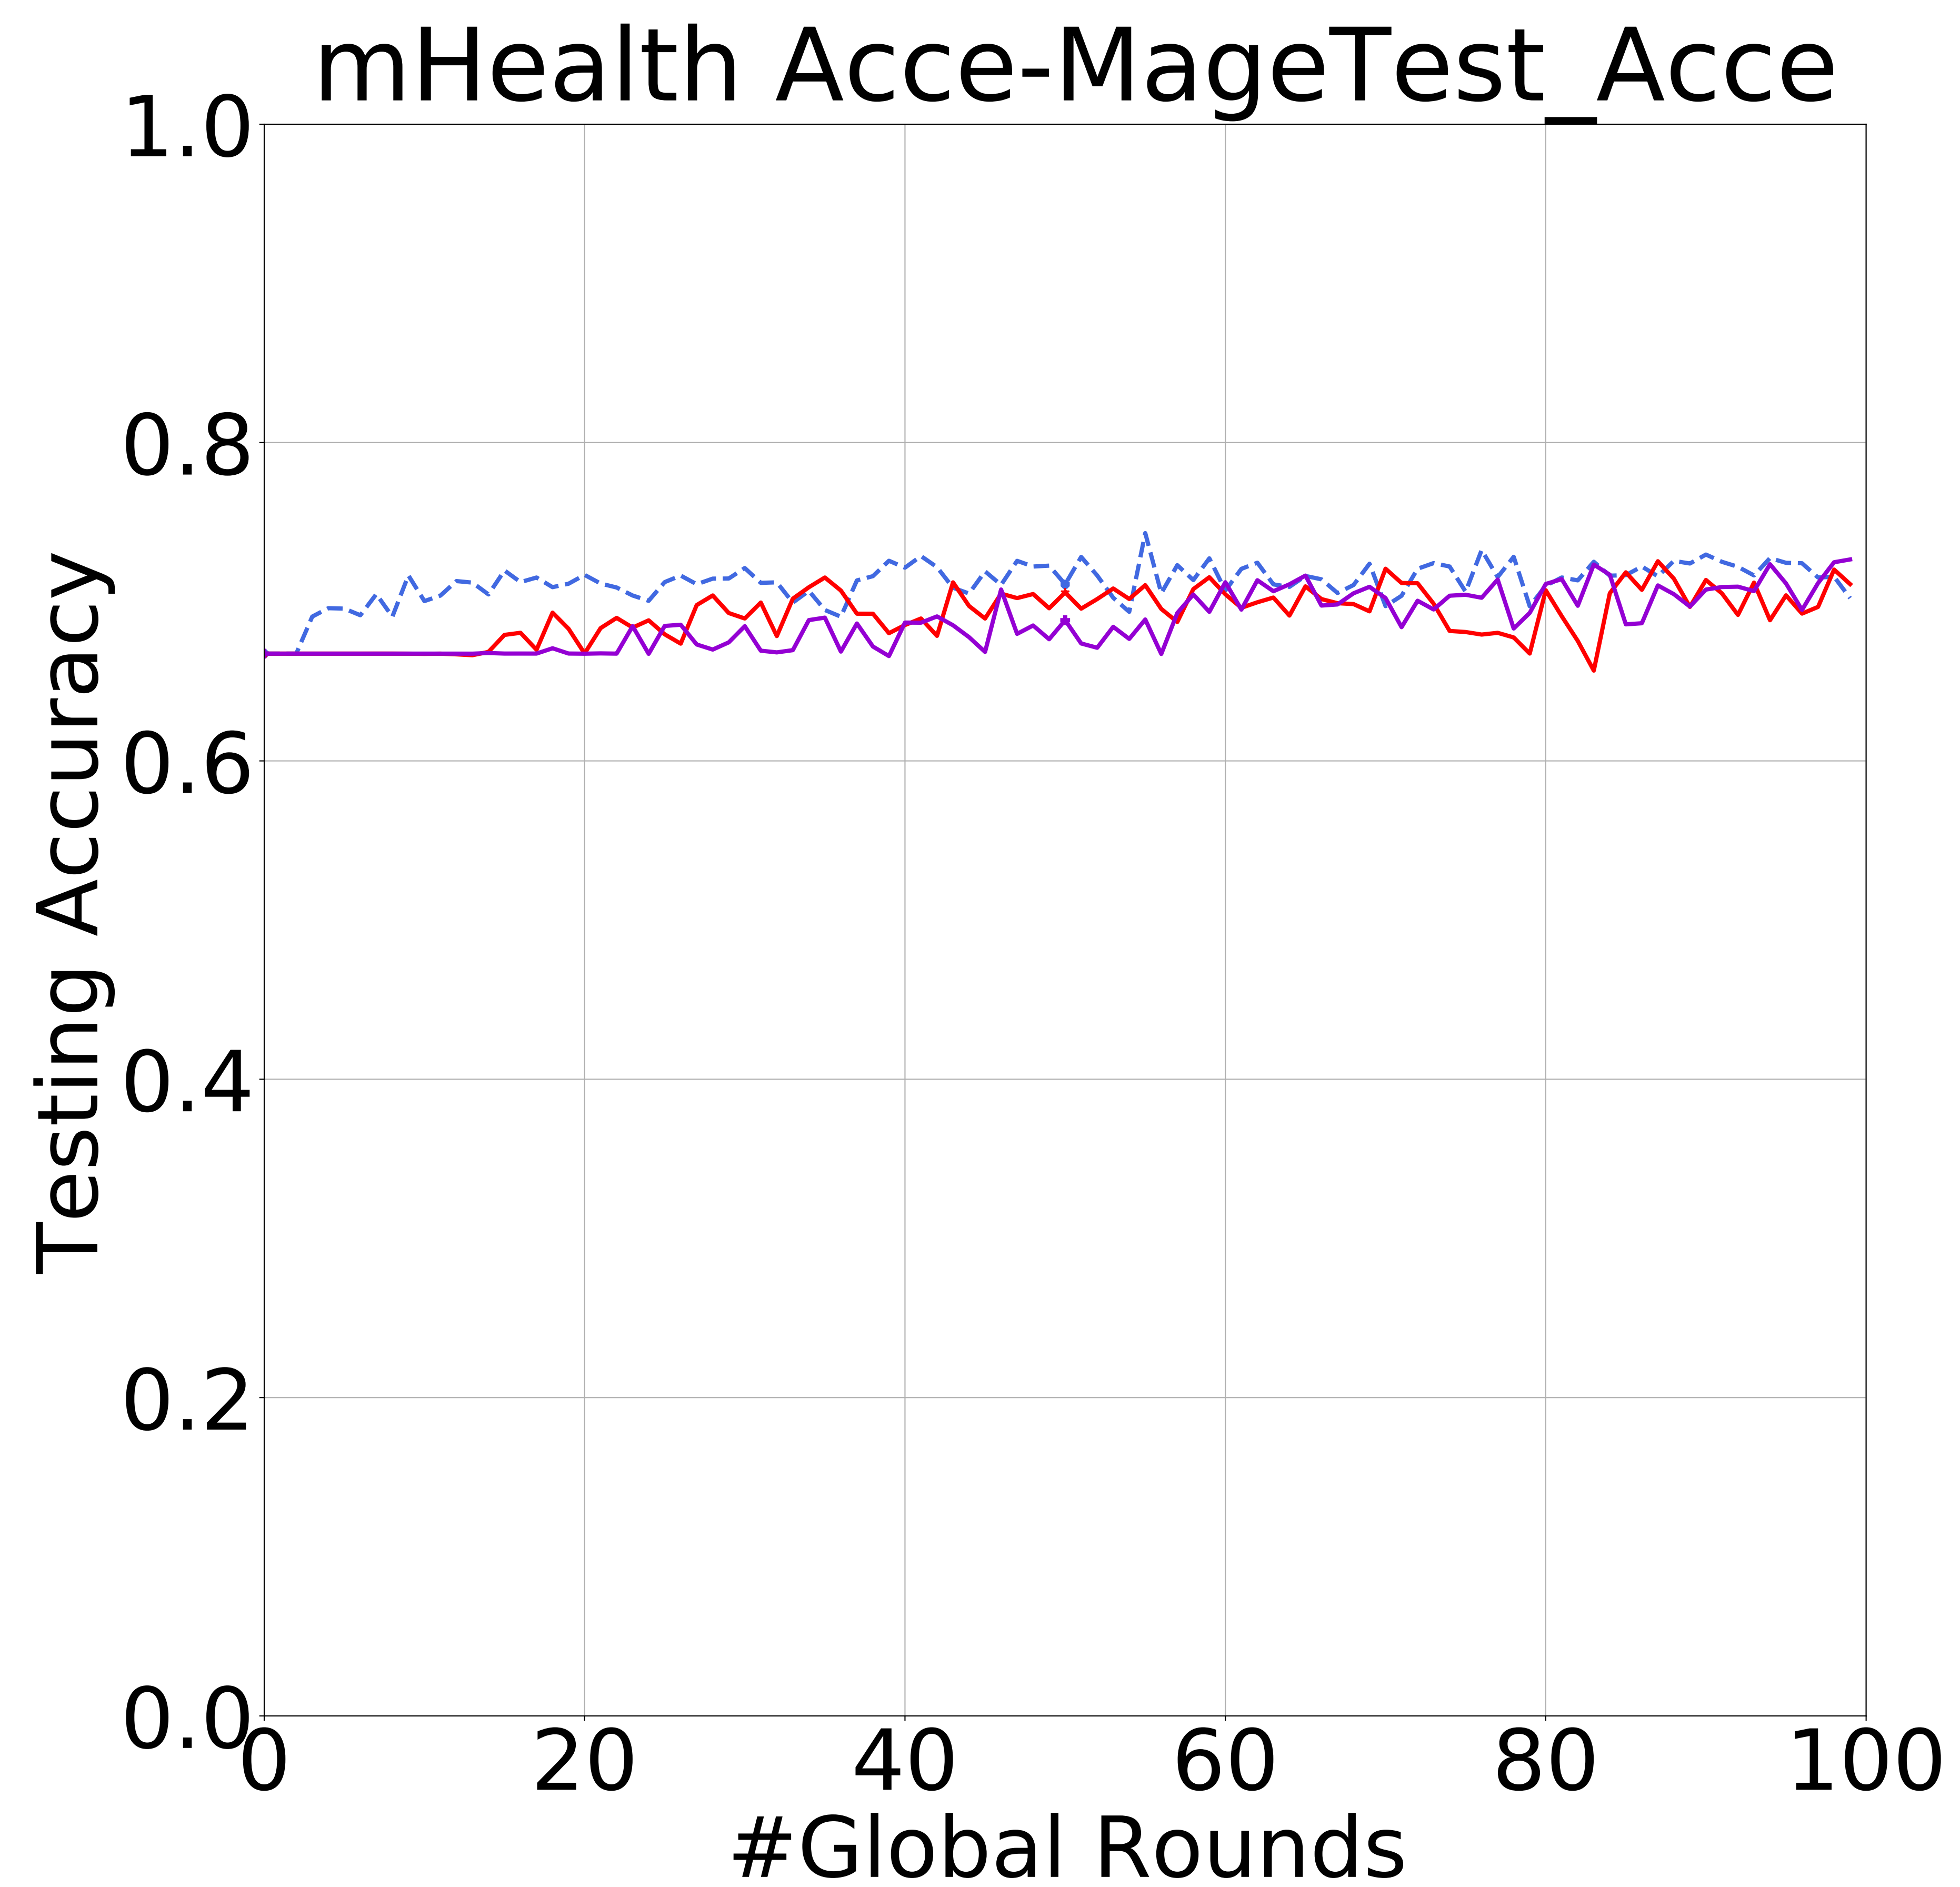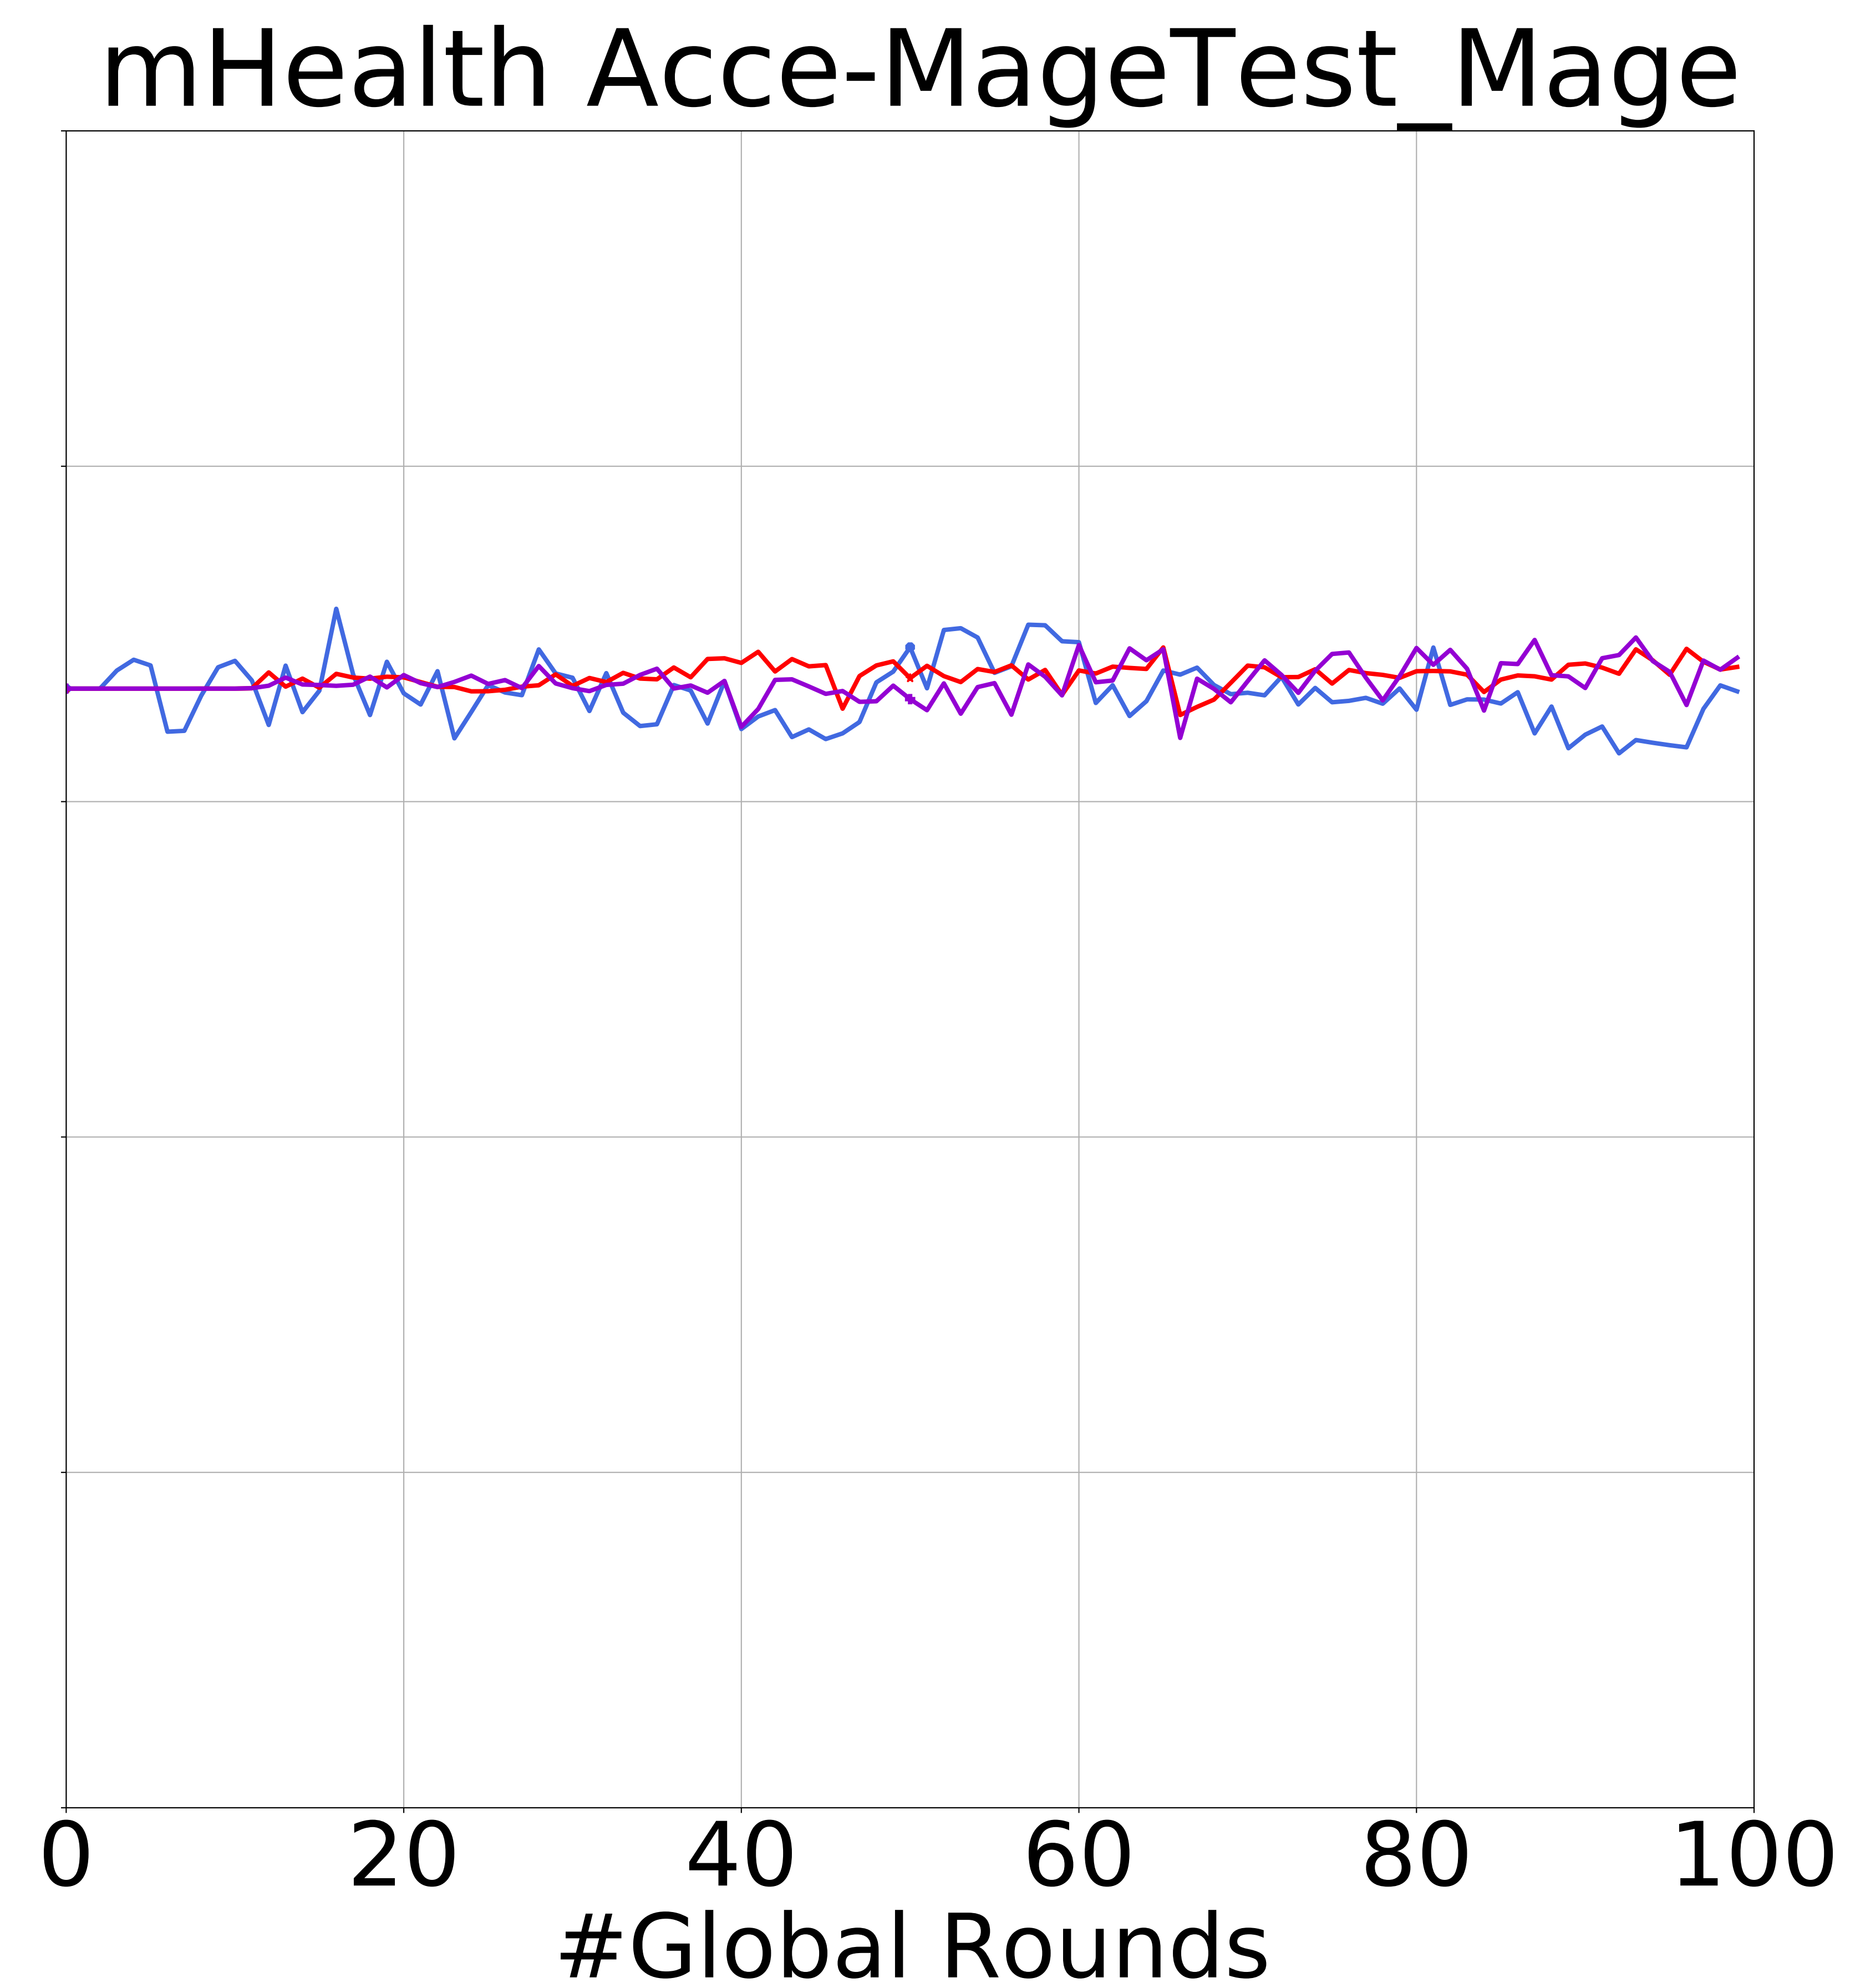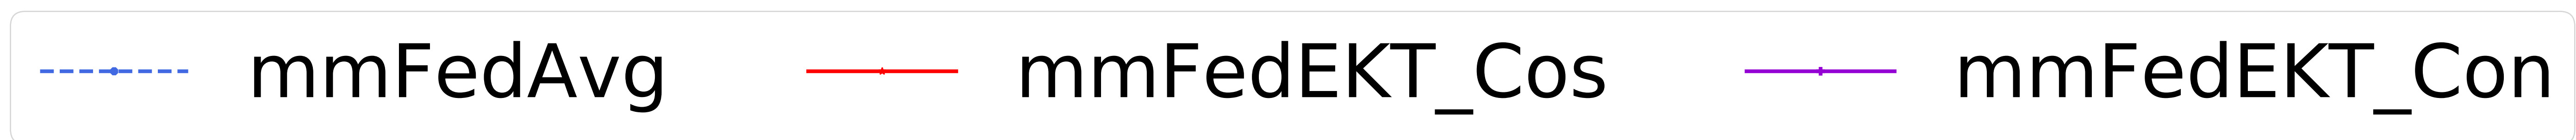

Supplement: supplementary_material [file attachment]
